# The FDA-approved drug Nelfinavir inhibits lytic cell-free transmission of human adenoviruses

Fanny Georgi <sup>1</sup>, Vardan Andriasyan <sup>1</sup>, Robert Witte <sup>1</sup>, Luca Murer <sup>1</sup>, Silvio Hemmi <sup>1</sup>, Lisa Yu <sup>1</sup>, Melanie Grove <sup>1</sup>, Nicole Meili <sup>1</sup>, Fabien Kuttler <sup>2</sup>, Artur Yakimovich <sup>1,3,4</sup>, Gerardo Turcatti <sup>2</sup>, Urs F Greber <sup>1,5</sup>

<sup>1</sup> Department of Molecular Life Sciences, University of Zurich, Zurich, Switzerland

<sup>2</sup> Biomolecular Screening Facility, School of Life Sciences, Ecole Polytechnique Fédérale de Lausanne, Lausanne, Switzerland

<sup>3</sup> MRC Laboratory for Molecular Cell Biology, University College London, London, United Kingdom

<sup>4</sup> Artificial Intelligence for Life Sciences CIC, 40 Gowers walk, London, E1 8BH, United Kingdom

<sup>5</sup> Corresponding author: [urs.greber@mls.uzh.ch](mailto:urs.greber@mls.uzh.ch)

## Abstract

Adenoviruses (AdVs) are prevalent and give rise to chronic and recurrent disease. The human AdV (HAdV) species B and C, such as HAdV-C2, C5 and B14, cause respiratory disease, and constitute a health threat for immuno-compromised individuals. HAdV-Cs are well known for lysing cells, owing to the E3 CR1- $\beta$ -encoded adenovirus death protein (ADP). We previously reported a high-throughput image-based screening framework and identified an inhibitor of HAdV-C2 multi-round infection, Nelfinavir Mesylate. Nelfinavir is the active ingredient of Viracept, an FDA-approved inhibitor of the human immunodeficiency virus (HIV) aspartyl protease, and used to treat acquired immunodeficiency syndrome (AIDS). It is not effective against single round HAdV infections. Here, we show that Nelfinavir inhibits the lytic cell-free transmission of HAdV, indicated by the suppression of comet-shaped infection foci in cell culture. Comet-shaped foci occur upon convection-based transmission of cell-free viral particles from an infected cell to neighbouring uninfected cells. HAdV lacking ADP was insensitive to Nelfinavir, but gave rise to comet-shaped foci indicating that ADP enhances but is not required for cell lysis. This was supported by the notion that HAdV-B14 and B14p1 lacking ADP were highly sensitive to Nelfinavir, although HAdV-A31, B3, B7, B11, B16, B21, D8, D30 or D37 were less sensitive. Conspicuously, Nelfinavir uncovered slow-growing round-shaped HAdV-C2 foci, independent of neutralizing antibodies in the medium, indicative of non-lytic cell-to-cell transmission. Our study demonstrates the repurposing potential of Nelfinavir with post-exposure efficacy against different HAdVs, and describes an alternative non-lytic cell-to-cell transmission mode of HAdV.

38 **Graphical Abstract**

39

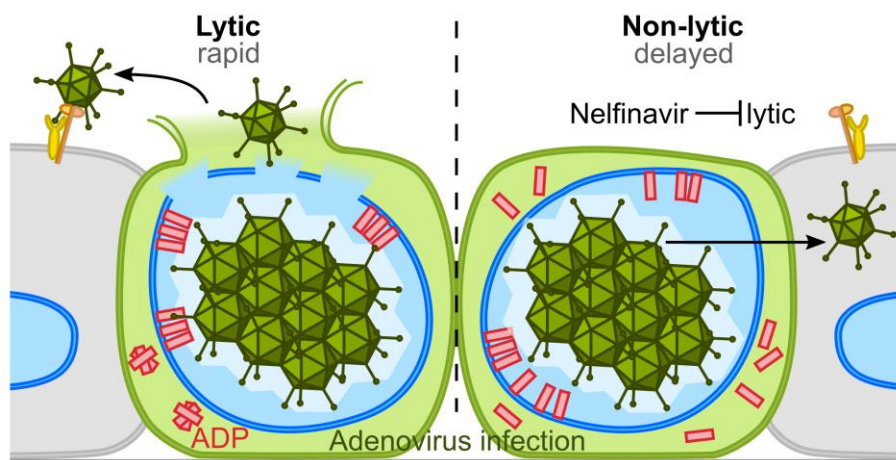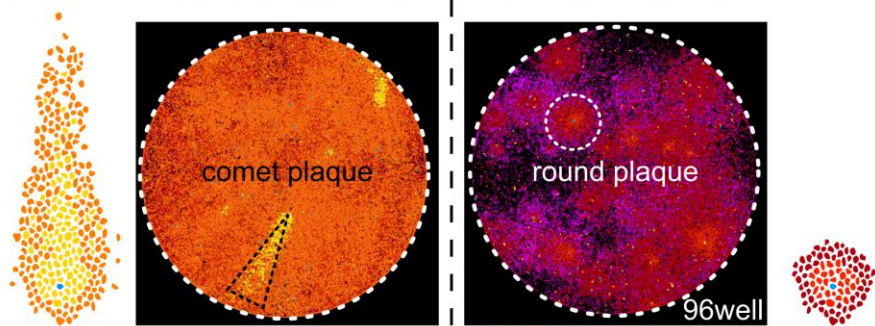

40

infection reporter expression at 1 2 3 4 5 6 7 days post infection

## 41 Introduction

42  
43 Adenovirus (AdV) was first described in 1953 by Rowe and co-workers as a cytopathogenic agent  
44 isolated from human adenoids (Rowe et al., 1953). More than 100 human AdV (HAdV) genotypes  
45 have since been characterized by molecular genetics or serology and grouped into seven species  
46 (Harrach et al., 2019; Ismail et al., 2019). HAdV species A, F and G replicate in the gastrointestinal  
47 tract, B, C and E in the respiratory organs, and B and D in conjunctival cells of the eyes. Species  
48 B members have a broad tropism, including kidney and cells of the hematopoietic lineage (Lion,  
49 2019; Lynch and Kajon, 2016; Mei et al., 2002). HAdV-caused illness can range from asymptomatic  
50 to lethal, especially in immunocompromised individuals (Bailey et al., 2018; Greber et al.,  
51 2013; Krilov, 2005). HAdV outbreaks are frequent in military training camps, but also nursery  
52 homes, as recorded in recurrent outbreaks of HAdV-E4 and HAdV-B7 (Erdman et al., 2002;  
53 Hwang et al., 2013; Lynch and Kajon, 2016; Potter et al., 2012; State of New Jersey Department  
54 of Health, 2019). To counter the disease burden, an oral HAdV-E4/B7 vaccine was reintroduced,  
55 leading to a sharp decline in adenoviral disease among military recruits (Deal et al., 2013; Lynch  
56 and Kajon, 2016; Radin et al., 2014). In addition to recurrent HAdV outbreaks, novel HAdV  
57 variants emerge, some of them causing pneumonia and death of elderly with chronic diseases.  
58 One of these emerging HAdVs is the HAdV-B14 variant 14p1, also known as 14a (Carr et al.,  
59 2011; Centers for Disease Control and Prevention (CDC), 2007; Lam et al., 2015; Louie et al.,  
60 2008; O'Flanagan et al., 2011). Furthermore, AdVs have a potential for zoonotic transmission  
61 (Benkő et al., 2014). Cross-species infections to humans from either non-human primates or  
62 psittacine birds have been reported from the USA and China, respectively (Chen et al., 2011b;  
63 To et al., 2014). Despite the high prevalence (Gray et al., 2007; Haque et al., 2018; Lynch and  
64 Kajon, 2016; Metzgar et al., 2007) and the broad use of AdV as gene therapy vectors (Ginn et al.,  
65 2018) as well as oncolytic viruses (Jiang et al., 2015; Lawler et al., 2017) no FDA-approved  
66 specific anti-HAdV treatment is available to date. Clinically, HAdV infections are treated with  
67 Ribavirin, Cidofovir, or more recently, Brincidofovir, which all inhibit viral DNA replication  
68 (Hiwarkar et al., 2017; Wold et al., 2019).

69  
70 HAdV particles have been well characterized. They have a double-stranded DNA genome of ~36  
71 kilo base pairs (kbp) packaged into an icosahedral capsid of about 90 nm in diameter (Benevento  
72 et al., 2014; Flatt and Greber, 2017; Liu et al., 2010; Reddy et al., 2010). HAdV-C2 and C5  
73 replication cycle has been extensively studied including entry, uncoating, replication, assembly  
74 and egress from the infected cell (Allen and Byrnes, 2019; Atasheva et al., 2019; Charman et al.,  
75 2019; Greber, 2002; Greber and Flatt, 2019; Hidalgo et al., 2019; Kleinberger, 2019; Lynch et al.,  
76 2019; Nemerow and Flint, 2019; Oliveira and Bouvier, 2019; Pied and Wodrich, 2019;  
77 Prusinkiewicz and Mymryk, 2019; Sohn and Hearing, 2019; Suomalainen and Greber, 2013;  
78 Wang et al., 2018). HAdV-C infects cells by binding to the coxsackievirus adenovirus receptor  
79 (CAR) and integrin co-receptors, followed by receptor-mediated endocytosis, endosomal lysis  
80 and microtubule-motor driven transport to the nucleus, where it uncoats DNA and delivers the  
81 DNA into the nucleus (Bauer et al., 2019; Bremner et al., 2009; Burckhardt et al., 2011; Gastaldelli  
82 et al., 2008; Leopold et al., 2000; Luisoni et al., 2015; Meier and Greber, 2004; Suomalainen and  
83 Greber, 2013; Suomalainen et al., 1999; Wang et al., 2017; Wiethoff et al., 2005; Wolfrum and

84 Greber, 2013; Zhou et al., 2018). The first viral protein expressed is E1A, a multifunctional  
85 intrinsically disordered protein controlling the transcriptional activity of all AdVs, as well as many  
86 cellular promoters, thereby affecting the cell cycle, differentiation, transformation and apoptosis  
87 (Berk, 2005; Ferrari et al., 2008; King et al., 2018; Pelka et al., 2008; Rao et al., 1992; Zemke and  
88 Berk, 2017). Viral early proteins besides E1A mediate immune escape, block activation of pro-  
89 apoptotic pathways and form nuclear viral DNA replication compartments. Late viral proteins give  
90 rise to mature progeny virions upon limited proteolysis of capsid proteins by the viral cysteine  
91 protease L3/p23 (Ahi and Mittal, 2016; Greber, 1998; Mangel and San Martín, 2014). Mature  
92 HAdV progeny is released upon rupture of the nuclear envelope and plasma membrane, which  
93 facilitates rapid viral dissemination and plaque formation *in vitro* (Doronin et al., 2003; Tollefson  
94 et al., 1996a; Yakimovich et al., 2012). The convection forces in the medium give rise to comet-  
95 shaped infection foci in cell cultures (Yakimovich et al., 2012). Foci of infected cells are also found  
96 in tissue, such as rat liver upon intravenous inoculation of HAdV-C5 (Haisma et al., 2008).  
97 Accordingly, acute HAdV infections trigger an inflammatory response, as shown in airways or  
98 conjunctiva of susceptible animals (Ismail et al., 2019; Kajon et al., 2003). In contrast to lytic virus  
99 transmission, direct cell-to-cell transmission leads to round plaques, as shown with vaccinia virus  
100 (Beerli et al., 2019; Doceul et al., 2010; Roberts and Smith, 2008; Zhong et al., 2013).

101  
102 The mechanisms of virus transmission are highly virus-specific. They comprise non-lytic pathways  
103 involving the secretory-endocytic circuits, multi-vesicular or autophagic membrane processes,  
104 cellular protrusions, or transient breaches of membrane integrity (Burckhardt and Greber, 2009;  
105 Jansens et al., 2020; Mothes et al., 2010; van der Grein et al., 2018; Zhong et al., 2013). In  
106 contrast, lytic egress pathways further involve the destabilization of cellular membranes by viral  
107 and host factors, often tuned by the cytoskeleton (Danthi, 2016; Madan et al., 2008; Scott and  
108 Griffin, 2015; Wang et al., 2018; Zhang et al., 2018). HAdV-C2 controls lytic cell death by the  
109 adenovirus death protein (ADP), also known as 11.6K, as concluded from genetic and  
110 overexpression studies (Doronin et al., 2003; Tollefson et al., 1996a). ADP is a type III membrane  
111 protein transcribed from the CR1- $\beta$  region in the immuno-regulatory E3a locus. All HAdV-C  
112 members harbour homologous E3a CR1- $\beta$  sequences (e.g. 10.5K in HAdV-C5). Other HAdV  
113 species differ in their E3 region, however (Davison et al., 2003a; Dhingra et al., 2019; Robinson  
114 et al., 2013). The N-terminus of ADP is luminal and the C-terminus protrudes into the cytosol  
115 (Scaria et al., 1992). Following post-translational modifications, ADP is transported to the inner  
116 nuclear membrane, where the N-terminus is intruding into the nucleus (Georgi and Greber,  
117 submitted). At late stages, when capsid assembly in the nucleus has commenced ADP expression  
118 is boosted (Tollefson et al., 1992; Wold et al., 1984). The mechanism of host cell lysis is still  
119 unknown, although necrosis-like, autophagic and caspase activities have been implicated (Abou  
120 El Hassan et al., 2004; Ito et al., 2006; Jiang et al., 2007, 2011).

121  
122 Here, we report that Nelfinavir is an effective inhibitor of HAdV lytic egress. The identification  
123 process of Nelfinavir is described in an accompanying paper using an imaging-based, high  
124 content screen of the Prestwick Chemical Library (PCL) comprising 1,280 mostly clinical or  
125 preclinical compounds (Georgi et al., 2020; Yakimovich et al., 2015). Nelfinavir is the off-patent

126 active pharmaceutical ingredient of Viracept, FDA-approved, which inhibits the human immuno-  
127 deficiency virus (HIV) protease (Kaldor et al., 1997). The work here documents the repurposing  
128 potential of Nelfinavir, which is effective against a spectrum of HAdV types in a post exposure  
129 manner. Nelfinavir is partly, but not exclusively, active against ADP-encoding HAdV types, and  
130 uncovers the appearance of round-shaped plaques, which arise upon non-lytic cell-to-cell viral  
131 transmission.



## 132 **Materials and Methods**

133

### 134 **Viruses**

135 HAdV-C2-dE3B-GFP was previously described (Yakimovich et al., 2012) (GenBank accession  
136 number MT277585). The virus was generated by exchange of the viral E3b genome region with  
137 a reporter cassette harbouring the enhanced green fluorescent protein (GFP) under a consti-  
138 tutively active cytomegalovirus (CMV) promoter. It was grown in A549 cells and purified by double  
139 CsCl gradient centrifugation (Greber et al., 1993). Aliquots supplemented with 10% (v / v) glycerol  
140 were stored at -80°C. HAdV-C2-dE3B-GFP was found to be homogeneous by SDS-PAGE and  
141 negative-stain analyses in transmission electron microscopy (EM). Recombinant HAdV-C2-dE3B-  
142 GFP-dADP was generated using homologous recombination according to the Warming  
143 recombineering protocols (Sirena et al., 2004; Warming et al., 2005). For a detailed protocol, see  
144 Supplementary methods. HAdV-C2-dE3B-GFP-dADP was plaque-purified and amplified,  
145 followed by two rounds of CsCl purification (Hemmi et al., 1998). Aliquots containing 10% (v / v)  
146 glycerol were stored at -80°C. HAdV-C2-dE3B-GFP-dADP was found to be homogeneous in  
147 SDS-PAGE and negative-stain analyses by transmission EM. Lack of ADP expression was  
148 confirmed by Western immunostaining using the rabbit  $\alpha$ -HAdV-C2-ADP<sub>78-93</sub> antibody, obtained  
149 from William Wold and Ann Tollefson (Saint-Louis University, Saint-Louis, USA) (Tollefson et al.,  
150 2003).

151

152 HAdV types A31, B7, B11, B14a, B16, B34, C1, C6, D8, D30 and D37 were kindly provided by  
153 the late Thomas Adrian (Hannover Medical School, Germany) and were verified by DNA  
154 restriction analysis (Adrian et al., 1986; Pacesa et al., 2017). HAdV types B14 (Carr et al., 2011;  
155 O'Flanagan et al., 2011) and B21a, isolate LRTI-6 (Kajon et al., 2015) were kindly provided by  
156 Albert Heim (Hannover Medical School, Germany). HAdV-B3-pIX-FS2A-GFP and B35-pIX-FS2A-  
157 GFP contain an enhanced GFP open reading frame (ORF) genetically fused to the downstream  
158 end of the HAdV pIX gene using an autocleavage FS2A sequence (Jetzer, 2018; Robinson et al.,  
159 2009; Studer, 2017). rec700 (Wold et al., 1986) and dl712 (Bhat and Wold, 1986) were obtained  
160 from William Wold (Saint-Louis University, Saint-Louis, USA). rec700 is a recombinant HAdV-C5  
161 containing C2 sequences from nucleotide -236 to 2437 of the E3 transcription unit, and comprises  
162 the C2 E3a ORFs 12.5K, 6.7K, 19K and ADP, as well as major parts of the E3b ORF RID $\square$  (10.4K  
163 protein) (Wold and Gooding, 1991). Mouse adenovirus (MAdV)-1-pIX-FS2A-GFP and MAdV-3-  
164 pIX-FS2A-GFP were constructed as described (Bieri, 2018; Hendrickx, 2016). HAdV-C2 and C5  
165 were obtained from Maarit Suomalainen (University of Zurich, Switzerland). HSV-1-CMV-GFP is  
166 a recombinant HSV-1 strain SC16 containing a CMV enhancer/promoter-driven enhanced GFP  
167 expression cassette in the US5 (gJ) locus (Glauser et al., 2010) and was kindly provided by Cornel  
168 Fraefel (University of Zurich, Switzerland). HSV-1-CMV-GFP was propagated in Vero cells and  
169 purified by sucrose sedimentation as described in (Ali and Roossinck, 2007; Crameri et al., 2018).  
170 All viruses were stored in small aliquots containing 10% (v / v) glycerol at -80°C.

171

### 172 **Cell lines**

173 A549 (human adenocarcinomic alveolar basal epithelium, CCL-185), HeLa (human epithelial  
174 cervix carcinoma, CCL-2) and HBEC (HBEC3-KT, normal human bronchial epithelium, CRL-

175 4051) cells were obtained from the American Type Culture Collection (ATCC, Manassas, USA).  
176 HCE (normal human corneal epithelium) cells were obtained from Karl Matter (University College  
177 London, UK). CMT93 (mouse rectum carcinoma) cells were obtained from Susan Compton, Yale  
178 School of Medicine, USA. A549, HeLa, HCE and CMT-93 cell cultures were maintained in high  
179 glucose DMEM (Thermo Fisher Scientific, Waltham, USA) containing 7.5% (v / v) FCS (Invitrogen,  
180 Carlsbad, USA), 1% (v / v) L-glutamine (Sigma-Aldrich, St. Louis, USA) and 1% (v / v) penicillin  
181 streptomycin (Sigma-Aldrich, St. Louis, USA) and subcultured following phosphate-buffered  
182 saline (PBS) washing and trypsinisation (Trypsin-EDTA, Sigma-Aldrich, St. Louis, USA) bi-  
183 weekly. HBEC cells were maintained in endothelial-basal medium (ATCC, Manassas, USA) and  
184 passaged 1:1 weekly following PBS washing and trypsinisation. Cell cultures were grown at  
185 standard conditions (37°C, 5% CO<sub>2</sub>, 95% humidity) and passage number was limited to 20.  
186 Respective supplemented medium is referred to as supplemented medium.

187

## 188 **Compounds**

189 Nelfinavir (CAS number 159989-65-8) powder was obtained from MedChemExpress LLC  
190 (Monmouth Junction, USA and Selleck Chemicals, Houston, USA). Compound was dissolved in  
191 DMSO (Sigma-Aldrich, St. Louis, USA) at 100 mM and kept at -80°C or -20°C for long-term or  
192 working storage, respectively.

193

## 194 **Cellular impedance measurement**

195 Impedance-based assays were performed using the xCELLigence system (Roche Applied  
196 Science and ACEA Biosciences) as described previously (Prasad et al., 2014, 2020a) according  
197 to the manufacturer's instructions (Spiegel, 2009) in cell culture environment (37°C, 5% CO<sub>2</sub>, 95%  
198 humidity) in duplicates. The 16-well E plates have a gold-plated sensor array embedded in their  
199 glass bottom by which the electrical impedance across each well bottom is measured. The  
200 impedance per well termed cell index (CI) is recorded as a dimensionless quantity. The  
201 background CI was assessed following the addition of 50 µl supplemented medium to each well  
202 and equilibration in the incubation environment. After 30 min equilibration, 9,000 A549 ATCC cells  
203 in 50 µl supplemented medium were added per well and measurement was started.

204

205 For the quantification of Nelfinavir toxicity, 50 µl supernatant was removed 18 h later and replaced  
206 by 2-fold concentrated Nelfinavir or DMSO solvent as the control dilution in supplemented medium  
207 (final Nelfinavir concentration 0.4-100 µM in 100 µl / well). The control was supplemented medium.  
208 Impedance was recorded every 15 min over 5 days. Cytotoxicity of Nelfinavir over time is given  
209 as toxic concentration 50%, TC<sub>50</sub>. It indicates the concentration at which the cumulated  
210 impedance of the treated cells is twice as high as background impedance levels. TC<sub>50</sub> was  
211 calculated by non-linear regression of solvent-normalized CI over the concentration of Nelfinavir.

212

213 For the quantification of Nelfinavir effects on the cytopathogenicity of HAdV-C2-dE3B-GFP  
214 compared to HAdV-C2-dE3B-GFP-dADP infection, 50 µl supernatant were removed 18 h later  
215 and replaced with Nelfinavir- and virus-supplemented medium. 25 µl of a 4-fold concentrated  
216 Nelfinavir (final concentration 0.4-100 µM) or corresponding DMSO solvent control dilution (final  
217 concentration 1%) in supplemented medium or supplemented medium only were added to 50 µl

218 medium containing cells. Additionally, 25  $\mu$ l of a 4-fold concentrated virus stock dilution were  
219 added (final inoculum  $1.68 \times 10^6$  viral particle(s) (VP) / well HAdV-C2-dE3B-GFP and  $2.68 \times 10^6$  VP/  
220 well HAdV-C2-dE3B-dADP, corresponding to  $\sim 30$  plaque forming unit(s) (pfu) / well). The delay  
221 of infection-induced cytotoxicity was calculated as time point at which the CI of the infected cells  
222 had decreased by 50% relative to its maximum. Data analysis was performed using GraphPad  
223 (GraphPad Software, Inc, version 8.1.2), and curve fitting was performed using three-parameter  
224 [inhibitor] vs. response nonlinear regression.

225

### 226 **Fluorescence-based plaque forming assay**

227 Per 96-well, 15,000 A549, 10,000 HeLa ATCC, 30,000 HBEC, 30,000 HCE or 30,000 CMT-93  
228 cells were seeded in 100  $\mu$ l of the respective supplemented medium and allowed to settle for 1 h  
229 at room temperature (RT) prior to cell culture incubation at 37°C, 5% CO<sub>2</sub>, 95% humidity. The  
230 following day, the medium was replaced by 50  $\mu$ l of the respective virus stock dilution giving rise  
231 to 5 to 50 plaques per 96-well. 50  $\mu$ l Nelfinavir to obtain 0.1 to 50  $\mu$ M final concentration or DMSO  
232 solvent control was also added, both in supplemented medium. For each experiment, a non-  
233 infected, treated control was performed. For uphill plaque assays, medium volume was increased  
234 to 150  $\mu$ l with identical virus and drug concentrations. For wash-in/wash-out experiments, virus  
235 was incubated on the cells in supplemented medium for 1 h at 37°C, cells were washed with PBS  
236 and 100  $\mu$ l drug dilution in supplemented medium was added. All experiments were performed in  
237 four technical replicates or as indicated. Cells were incubated at standard cell culture conditions.  
238 At the indicated time post infection (pi), the cells were fixed and the nuclei stained for 1 h at RT  
239 by addition of 33  $\mu$ l 16% (w / v) para-formaldehyde (PFA) and 4  $\mu$ g / ml Hoechst 33342 (Sigma-  
240 Aldrich, St. Louis, USA) in PBS. Cells were washed three times with PBS and stored in PBS  
241 supplemented with 0.02% N<sub>3</sub> for infections with viruses harbouring a GFP transgene. For wild  
242 type (wt) viruses, cells were quenched in PBS supplemented with 50 mM NH<sub>4</sub>Cl, permeabilized  
243 using 0.2% (v / v) Triton-X100 in PBS and blocked with 0.5% (w / v) BSA in PBS. Cells were  
244 incubated with 381.7 ng / ml mouse  $\alpha$ -HAdV hexon protein antibody (Mab8052, Sigma-Aldrich,  
245 St. Louis, USA) and subsequently stained using 2  $\mu$ g / ml goat  $\alpha$ -mouse-AlexaFluor594 (A21203  
246 or A32742, Thermo Fisher Scientific, Waltham, USA). Plates were imaged on either an IXM-XL  
247 or IXM-C automated high-throughput fluorescence microscope (Molecular Devices, San Jose,  
248 USA) using a 4x objective at widefield mode. Hoechst staining was recorded in DAPI channel,  
249 FITC / GFP channel for viral GFP and TRITC / Texas red channel for immunofluorescence hexon  
250 staining.

251

### 252 **Therapeutic index measurement**

253 The infection phenotype for each well was quantified using Plaque2.0 (Yakimovich et al., 2015).  
254 The number of plaques was determined based on the infection signal (viral GFP or hexon  
255 immunofluorescence staining). Nuclei were segmented based on Hoechst signal by CellProfiler  
256 (Carpenter et al., 2006). Hereof infected nuclei were classified based on the median infection  
257 signal per nucleus in CellProfiler. Data were plotted and EC<sub>50</sub> (infected and treated cells), TC<sub>50</sub>  
258 (non-infected, treated cells), as well as the corresponding standard error (SE) determined based  
259 on curve fitting in GraphPad (GraphPad Software, Inc, version 8.1.2) using three-parameter



260 [inhibitor] vs. response nonlinear regression. Mean  $TI_{50}$  was calculated as  $EC_{50} / TC_{50}$  ratio of the  
261 means. The  $TI_{50}$  SE is calculated by error propagation.

262

### 263 **Quantification of viral protein expression**

264 Infection, HAdV hexon immunofluorescence staining, and imaging were performed as described  
265 under Microscopic plaque assay in technical quadruplicates. Single nuclei were segmented based  
266 on the Hoechst signal, using CellProfiler (Carpenter et al., 2006). Median GFP and hexon signal  
267 per nucleus were measured and infected nuclei were classified based on the median GFP signal  
268 per nucleus and. Subsequently, mean and standard deviation (SD) over all infected nuclei per  
269 well were calculated in R version 3.3.2 (R Core Team, 2018). Data were plotted in GraphPad  
270 (GraphPad Software, Inc, version 8.1.2).

271

### 272 **Transmission electron microscopy**

273 A549 ATCC cells grown on Alcian Blue-treated cover slips were infected with HAdV-C2-dE3B-  
274 GFP in supplemented medium with 0, 1.25 or 3  $\mu$ M Nelfinavir and cultured for 40 h at standard  
275 cell culture conditions. The samples were washed with ice-cold 0.1 M cacodylate buffer (pH 7.4)  
276 and fixed at 4°C in 0.1 M ice-cold cacodylate buffer (pH 7.4), supplemented with 2.5% (v / v)  
277 glutaraldehyde and 0.5 mg / ml ruthenium red for 1 h. Cells were washed with 0.1 M cacodylate  
278 buffer (pH 7.4) and post-fixed at RT in 0.05 M cacodylate buffer (pH 7.4) supplemented with 0.5%  
279 (v / v)  $OsO_4$  and 0.25 mg / ml ruthenium red for 1 h. Following washing with 0.1 M cacodylate  
280 buffer (pH 7.36) and  $H_2O$ , the samples were incubated in 2% (v / v) uranyl acetate at 4°C over  
281 night (ON). The samples were dehydrated in acetone and embedded in Epon as described in  
282 (Greber et al., 1997). 85 nm slices were obtained (Leica Ultracut UCT, Leica, Wetzlar, Germany)  
283 and stained with uranyl acetate.

284

### 285 **HAdV-C5 virus production in presence of Nelfinavir**

286 HAdV-C5 was amplified in the medium containing 0, 1.25 or 3  $\mu$ M Nelfinavir for 4 days. Cells were  
287 harvested and disrupted by three freeze / thaw cycles. The cell debris was removed by Freon  
288 extraction and mature full HAdV virions were purified by two rounds of CsCl gradient ultracentri-  
289 fugeation (Hemmi et al., 1998). Protein concentration was determined by BCA assay (Pierce BCA  
290 Protein Assay Kit, Thermo Fisher Scientific, Waltham, USA). For long-term storage, virus stocks  
291 were supplemented with 10% (v / v) glycerol and kept at -80°C.

292

### 293 **Negative staining electron microscopy**

294 Double CsCl gradient-purified HAdV particles were adhered to Collodion and 2% (v / v) amyl  
295 acetate film-covered grids (300 mesh Formvar/carbon-supported copper support films, Electron  
296 Microscopy Sciences, Hatfield, USA). Viral particles were negatively stained with 2% (v / v) uranyl  
297 acetate and viewed on a transmission electron microscope (Philips CM100, Philips, Amsterdam,  
298 Netherlands) at 100 kV. Images were acquired using a CCD camera (Orius SC1000 with 4,000 x  
299 2,600 pixels, Gatan, Pleasanton, USA).

300

### 301 **Western blot analysis of HAdV protease activity**

302 Double CsCl-purified grown in presence / absence of Nelfinavir (HAdV-C5<sup>±Nelfinavir</sup>) stocks and size  
303 standard (PageRuler plus, Thermo Fisher Scientific, Waltham, USA) were size-separated on 12%  
304 acrylamide gel under reducing conditions and transferred to a PVDF membrane. HAdV proteins  
305 were detected using the following primary antibodies: 1:10,000 R72 rabbit  $\alpha$ -fiber (Baum et al.,  
306 1972), 1:1,000 rabbit  $\alpha$ -pVI/VI (Burckhardt et al., 2011), 1:1,000 R3 rabbit  $\alpha$ -pVII/VII (Ulf Petters-  
307 son of Uppsala University) and visualized using a goat  $\alpha$ -rabbit-HRP (7074, Cell Signaling  
308 Technology, Danvers, USA) and ECL Prime Western Blotting Detection Reagent (GE Health  
309 Care, Pittsburgh, USA). The membranes were luminescence imaged on an Amersham Imager  
310 680 (GE Health Care, Pittsburgh, USA).

311

### 312 **Determination of nuclear size**

313 Infection and Nelfinavir treatment of A549 cells were performed as described under Microscopic  
314 plaque assay with a cell seeding density of 15,000 cells / well. Wells were imaged with IXM-C  
315 automated high-throughput fluorescence microscope (Molecular Devices, San Jose, USA) using  
316 a 40x objective (NA 0.95) at confocal mode (62  $\mu$ m pinhole). DAPI channel was acquired for  
317 nuclear Hoechst staining, FITC / GFP channel was acquired for viral GFP, TRITC / Texas red  
318 channel was acquired for immunofluorescence ADP staining and Cy5 channel was acquired for  
319 NHS-ester signal. 30 z steps with 0.5  $\mu$ m step size were acquired for each channel and maximal  
320 projections were calculated. Image analysis was performed using CellProfiler (Carpenter et al.,  
321 2006). Nuclei areas were segmented based on thresholded Hoechst signal. Infected cells were  
322 classified based on a fixed threshold for median nuclear GFP intensity. Data processing was  
323 performed in R version 3.3.2 (R Core Team, 2018). Statistical analysis was performed in Graph-  
324 Pad (GraphPad Software, Inc, version 8.1.2) using the non-parametric Kolmogorov-Smirnov test.

325

### 326 **Cell binding assay of virus**

327 A549 cells were seeded at 7,500 cells per 96-well in full DMEM and allowed to attach over night  
328 at standard cell culture conditions. The next day, the medium was replaced by  $3 \times 10^8$  VP/ well of  
329 double CsCl-purified HAdV-C5<sup>±Nelfinavir</sup> virus stocks in 100  $\mu$ l ice-cold supplemented medium and  
330 kept on ice for 30 min. Following a 15 min entry phase under standard cell culture conditions the  
331 cells were fixed and the nuclei stained for 1 h at RT by addition of 33  $\mu$ l 16% PFA and 4  $\mu$ g / ml  
332 Hoechst 33342 (Sigma-Aldrich, St. Louis, USA) in PBS. Following the above described immuno-  
333 fluorescence staining procedure, the cell-bound HAdV virions were stained using 9C12 mouse  $\alpha$ -  
334 hexon (developed by Laurence Fayadat and Wiebe Olijve, obtained from Developmental Studies  
335 Hybridoma Bank developed under the auspices of the National Institute of Child Health and  
336 Human Development and maintained by the University of Iowa, Iowa City, USA) (Varghese et al.,  
337 2004) and goat  $\alpha$ -mouse AlexaFluor488 (A11029, Thermo Fisher Scientific, Waltham, USA). Total  
338 area was identified by Alexa-Fluor647 NHS ester staining (A20006, Thermo Fisher Scientific,  
339 Waltham, USA). Max projections of confocal z-stacks (25 z steps spaced 1  $\mu$ m) were acquired on  
340 a SP5 resonant APD (Leica, Wetzlar, Germany) at 1.7x zoom using a 63x glycerol objective  
341 (numerical aperture 1.4).

342

### 343 **Assessment of HAdV infectivity of HAdV-C5<sup>±Nelfinavir</sup>**

344 Fifteen thousand A549 cells were seeded per 96-well in full DMEM and allowed to attach over  
345 night at standard cell culture conditions. The next day, the medium was replaced by double CsCl-  
346 purified HAdV-C5<sup>±Nelfinavir</sup> virus stocks at 50 to 0.001 pg / well of BCA-based viral protein  
347 concentration and incubated at standard cell culture conditions. Cells were fixed at 52 hpi, stained  
348 for HAdV hexon expression and imaged following the procedure described under Image-based  
349 plaque assay. Images were quantified using Plaque2.0 (Yakimovich et al., 2015). Nuclei were  
350 segmented based on Hoechst signal. Infected cells were segmented based on hexon  
351 immunofluorescence staining signal.

352

### 353 **Egress assay**

354 A549 cells were seeded at 480,000 cells per 6-well in full DMEM and infected at 1,100 pfu HAdV-  
355 C2-dE3B-GFP per well the next day. Following 1 h of warm incubation, the supernatant was  
356 removed, and cells were washed with PBS and detached by trypsin digestion. Infected cells were  
357 centrifuged and resuspended in fresh medium to remove any unbound input virus and seeded at  
358 180,000 cells / 12-well in medium supplemented with 1.25, 3 or 10  $\mu$ M Nelfinavir or equivalent  
359 amounts of DMSO solvent control. At the indicated times pi, the supernatant was harvested and  
360 cleared by centrifugation. 200  $\mu$ l PBS / well was added to the infected monolayer. Cells were  
361 disrupted by three freeze / thaw cycles and freon extraction was performed. Supernatant and cell  
362 lysate were stored at 4°C until titration on naive A549 cells. PFA-fixed, Hoechst-stained cells were  
363 imaged at 44 hpi using a 4x objective (NA 0.20) on an epifluorescence IXM-XL (Molecular  
364 Devices, San Jose, USA). GFP-positive infected cells were classified based on median nuclear  
365 GFP intensity using automated image analysis by CellProfiler (Carpenter et al., 2006).

366

### 367 **Quantification of infectious progeny production**

368 Four hundred and eighty thousand A549 cells were seeded per 6-well dish and inoculated with  
369 1,100 pfu HAdV-C2-dE3B-GFP / well for 1 h at 37°C, washed with PBS and detached by trypsin  
370 digestion. Infected cells were centrifuged and resuspended in fresh medium to remove any  
371 unbound input virus. Cells were seeded at 180,000 cells / 12-well in medium supplemented with  
372 1.25, 3 or 10  $\mu$ M Nelfinavir or the respective DMSO solvent control. Viral progeny in the cell  
373 monolayer and supernatant was harvested at the indicated time pi by three freeze / thaw cycles.  
374 The lysates were cleared by centrifugation and stored at 4°C until titration on naive A549 cells.  
375 PFA-fixed, Hoechst-stained cells were imaged at 44 hpi using a 4x objective on an  
376 epifluorescence IXM-XL (Molecular Devices, San Jose, USA). GFP-positive infected cells were  
377 classified based on median nuclear GFP intensity using automated image analysis by CellProfiler  
378 (Carpenter et al., 2006). The yield per 12-well was extrapolated by linear regression of the number  
379 of infected cells per  $\mu$ l of harvested whole well lysate using GraphPad (GraphPad Software, Inc,  
380 version 8.1.2).

381

### 382 **Quantification of the antiviral potency of Nelfinavir**

383 Infection was performed as described under Microscopic plaque assay. Cells were incubated with  
384 an inoculum ranging between 10 - 2,560 pfu / well HAdV-C2-dE3B-GFP for 1 h at 37°C. Cells  
385 were washed with PBS and 100  $\mu$ l DMEM phenol-free medium (Thermo Fisher Scientific,

386 Waltham, USA), supplemented with 1% penicillin streptomycin (Sigma-Aldrich, St. Louis, USA),  
387 1% L-glutamine (Sigma-Aldrich, St. Louis, USA), 7.5% FBS (Invitrogen, Carlsbad USA), 1% non-  
388 essential amino acids (Sigma-Aldrich, St. Louis, USA), 1% 100 mM sodium pyruvate (Thermo  
389 Fisher Scientific, Waltham, USA), 0.25 ng / ml Hoechst 33342 (Sigma-Aldrich, St. Louis, USA)  
390 and 1 µg / ml propidium iodide (PI, Molecular Probes, Eugene, USA). Plates were imaged at the  
391 indicated times pi on an IXM-C automated high-throughput fluorescence microscope (Molecular  
392 Devices, San Jose, USA) using a 40x objective (NA 0.95) at confocal mode (62 µm pinhole). DAPI  
393 channel was acquired for nuclear Hoechst staining, FITC / GFP channel was acquired for viral  
394 GFP and Cy5 channel was acquired for PI signal. 30 z steps with 0.5 µm step size were acquired  
395 for each channel and maximal projections were calculated.

396

### 397 **Morphological plaque characterization**

398 Plaques were segmented in Plaque2.0 (Yakimovich et al., 2015) and plaque region eccentricity  
399 was measured as fraction of the distance between the two focal points of the ellipse divided by  
400 the length of the major axis. Only plaque regions consisting of at least five infected cells  
401 ( $\geq 6,000$  px<sup>2</sup>) with a centroid located 600 px from the well rim were considered to exclude spatial  
402 limitations. Plaque roundness was calculated as 1- eccentricity (Equation 1).

$$403 \text{ roundness} = 1 - \frac{4\pi * \text{area}}{\text{perimeter}^2} \quad \text{Equation 1}$$

404 Statistical analysis was performed in GraphPad (GraphPad Software, Inc, version 8.1.2) using  
405 the non-parametric Kolmogorov-Smirnov test.

406

### 407 **Confocal microscopy of ADP localization**

408 Infection and immunofluorescence stainings were performed as described under Microscopic  
409 plaque assay with a cell seeding density of 3,000 cells / well. Cells were incubated with 1:1,000  
410 rabbit  $\alpha$ -HADV-C2-ADP<sub>87-101</sub> antibody (Tollefson et al., 2003) and subsequently stained using  
411 donkey  $\alpha$ -rabbit-AlexaFluor594 (21207, Thermo Fisher Scientific, Waltham, USA) and 0.2 µg/ml  
412 NHS ester (Life Technologies, Carlsbad, USA) for whole cell outline. Plates were imaged on an  
413 IXM-C automated high-throughput fluorescence microscope (Molecular Devices, San Jose, USA)  
414 using a 40x objective (NA 0.95) at confocal mode (62 µm pinhole). DAPI channel was acquired  
415 for nuclear Hoechst staining, FITC / GFP channel was acquired for viral GFP, TRITC / Texas red  
416 channel was acquired for immunofluorescence ADP staining and Cy5 channel was acquired for  
417 NHS ester signal. 30 z steps with 0.5 µm step size were acquired for each channel and maximal  
418 projections were calculated. Image analysis was performed using CellProfiler (Carpenter et al.,  
419 2006). Nuclei and whole cell areas were segmented based on thresholded Hoechst and NHS  
420 ester signal, respectively. Nuclear rim was defined as 10 pixel-wide area around the nuclear  
421 border. Infected cells were classified based on the whole cell 5% quantile GFP intensity. Whole  
422 cell and nuclear rim mean TRITC / Texas red (detecting ADP) intensities as well as whole cell 5-  
423 pixel granularity per infected cell were normalized by the according mean over all infected cells  
424 of the solvent control. Data processing was performed in R version 3.3.2 (R Core Team, 2018).  
425 Statistical analysis was performed in GraphPad (GraphPad Software, Inc, version 8.1.2) using  
426 the non-parametric Kolmogorov-Smirnov test.

427

#### 428 **Western blot analysis of ADP processing**

429 Four hundred and eighty thousand A549 cells were seeded per 6-well, incubated o/n and  
430 inoculated with HAdV-C2-dE3B-GFP at 22,000 pfu / well in 1.2 ml full DMEM supplemented with  
431 0 to 10  $\mu$ M Nelfinavir. Following 44 h of incubation in standard cell culture medium, cells were  
432 placed on ice and the supernatant was removed. The cells were washed twice with ice-cold PBS.  
433 Cells were lysed in 100  $\mu$ l COS lysis buffer (20 mM Tris-HCl pH 7.4, 100 mM NaCl, 1 mM EDTA,  
434 1% Triton X-100, 1 mM DTT, 25 mM  $\beta$ -Glycerophosphate disodium, 25 mM NaF, 1 mM Na<sub>3</sub>VO<sub>4</sub>,  
435 1x protease inhibitors (Mini Complete, Roche, Basel, Switzerland) for 5 min on ice. Supernatant  
436 and washing PBS were collected and cells pelleted by centrifugation at 16,000 xg for 5 min at  
437 4°C. Lysates were scraped off and used to resuspend the pelleted cells. Following another  
438 centrifugation, the supernatant was collected and stored at -20°C. Samples of 15  $\mu$ l lysate were  
439 supplemented with SDS-containing loading buffer (0.35 M Tris-HCl pH 6.8, 0.28% SDS, 30 g / l  
440 DTT, 0.6 g / l bromophenol blue). Samples were denatured at 95°C for 5 min and proteins were  
441 separated on a denaturing 15% acrylamide gel. Proteins transferred to a PVDF membrane were  
442 detected with 1:1,000 of a rabbit  $\alpha$ -HAdV-C2 ADP<sub>78-93</sub> antibody (Tollefson et al., 2003) followed  
443 by goat  $\alpha$ -rabbit-HRP (7074, Cell Signaling Technology, Danvers, USA). Protein bands were  
444 visualized using ECL Prime Western Blotting Detection Reagent (GE Health Care, Pittsburgh,  
445 USA) and luminescence imaged on an Amersham Imager 680 (GE Health Care, Pittsburgh,  
446 USA).

447

#### 448 **Neutralization of HAdV cell-free progeny**

449 A549 cells were seeded at 15,000 cells per well of a 96-well-plate, incubated o/n and inoculated  
450 with HAdV-C2-dE3B-GFP at 34 pfu / well for 1 h at 37°C. Virus was removed and cells were  
451 washed with PBS, before 0.25 ng / ml Hoechst (Sigma-Aldrich, St. Louis, USA)-supplemented  
452 DMEM medium containing 1:12 HAdV-C2/5-neutralizing dog serum, kindly supplied by Anja  
453 Ehrhardt, University Witten/Herdecke, Germany (Hausl et al., 2010), supplemented with 40% v /  
454 v glycerol), control goat serum (Thermo Fisher Scientific, Waltham, USA, supplemented with 40%  
455 v / v glycerol) or the corresponding volume glycerol only. Cells were imaged using a 4x objective  
456 (NA 0.20) on an epifluorescence IXM-XL microscope (Molecular Devices, San Jose, USA).

457

#### 458 **Crystal violet-stained plaques**

459 Plaque shapes were also assessed by conventional crystal violet-stained plaque assay,  
460 performed in A549 cells in liquid supplemented DMEM medium. All infections were performed at  
461 37°C, 95% humidity and 5% CO<sub>2</sub> atmosphere. At the indicated time pi, cells were fixed and  
462 stained for 60 min with PBS solution containing 3 mg / ml crystal violet and 4% PFA added directly  
463 to the medium from a 16% stock solution. Plates were de-stained in H<sub>2</sub>O, dried and imaged using  
464 a standard 20 mega pixel phone camera under white light illumination.



## 465 **Results**

466

### 467 **Nelfinavir is a non-toxic, potent inhibitor of HAdV-C multicycle infection**

468 An accompanying paper describes a full cycle, image-based screen of 1,278 out of 1,280 PCL  
469 compounds against HAdV-C2-dE3B-GFP, where Clopamide and Amphotericin B were excluded  
470 due to precipitation during acoustic dispensation into the screening plates (Georgi et al., 2020). The  
471 screen was conducted in adenocarcinomic human alveolar basal epithelial (A549) cells at  
472 1.25  $\mu\text{M}$  compound concentration, and identified Nelfinavir, Aminacrine, Dequalinium dichloride  
473 and Thonzonium bromide as hits (Supplementary Table 1). Nelfinavir (CAS number 159989-65-  
474 8), hereafter referred to as Nelfinavir, strongly inhibited plaque numbers at nanomolar concen-  
475 trations, comparable to the known HAdV nucleoside analogue inhibitor 3'-deoxy-3'-fluorothy-  
476 midine (DFT, Figure 1A, 1B). Dequalinium dichloride, Aminacrine and Thonzonium bromide were  
477 excluded from further analyses due to toxicity (Georgi et al., 2020), and potential mutagenic  
478 effects (Topal, 1984). Long-term incubations of uninfected A549 cells with Nelfinavir up to 115 h  
479 showed median toxicity  $\text{TC}_{50}$  of 25.7  $\mu\text{M}$ , as determined by cell impedance measurements using  
480 xCELLigence (Figure 1C), consistent with presto-blue assays and counts of cell nuclei  
481 (Supplementary Figure 1A, Supplementary Table 1). This was in agreement with previous reports,  
482 and acceptable side effects in clinical use against HIV (Kaldor et al., 1997; Moyle et al., 1998).  
483 The therapeutic index 50 ( $\text{TI}_{50}$ ) of Nelfinavir was 27.1 (Figure 1D), as determined by the ratio  
484 between the concentration yielding 50% loss of cell nuclei ( $\text{TC}_{50} = 10.01 \mu\text{M}$ ) and the effective  
485 concentration yielding 50% inhibition of fluorescent plaque formation ( $\text{EC}_{50} = 0.37 \mu\text{M}$ ). The data  
486 indicates that Nelfinavir is an effective, non-toxic inhibitor of HAdV-C2 multi-cycle infection.

487

### 488 **Nelfinavir does not affect single round infection**

489 We first tested if Nelfinavir affected viral protein production. HAdV-C2-dE3B-GFP-infected A549  
490 cells were analysed for GFP under the immediate early CMV promoter, and the late protein hexon  
491 expressed after viral DNA replication at 46 hours post infection (hpi). Results indicate that  
492 Nelfinavir had no effect on GFP or hexon expression at the tested concentrations, while the  
493 formation of fluorescent plaques was completely inhibited (Figure 2A, and Figure 1D). This result  
494 was in agreement with the notion that Nelfinavir did not affect the replication of the HAdV-C5  
495 genome, as determined by q-PCR (Gantt et al., 2011). We next examined if Nelfinavir affected  
496 the formation of viral particles. Transmission electron microscopy (TEM) of HAdV-C2-dE3B-GFP-  
497 infected cells revealed large numbers of virions in the nuclei of Nelfinavir-treated and untreated  
498 cells (Figure 2B). This result was conforming with the observation that the nuclei of Nelfinavir-  
499 treated cells expanded in area over time, indistinguishable from control cells (Supplementary  
500 Figure 1B).

501

502 To test if Nelfinavir affected virion maturation, we analysed purified virions by SDS-PAGE and  
503 Western blotting against proteins pVI/VI and pVII/VII using previously characterized antibodies.  
504 There was no evidence for increase of precursor VI or VII (pVI or pVII) in HAdV-C5 from Nelfinavir-  
505 treated cells, in contrast to temperature-sensitive (ts) 1 particles, which lack the L3/p23 protease  
506 due to the point mutation P137L in p23 (Imelli et al., 2009) (Figure 2C). This showed that Nelfinavir  
507 did not affect the proteolytic maturation of the virus by the L3/p23 cysteine protease. In

508 accordance, purified HAdV-C5 from Nelfinavir-treated cells attached to naive A549 cells and gave  
509 rise to viral gene expression as effectively as control HAdV-C5 particles (Figures 2D, 2E).  
510 Together, these results indicate that Nelfinavir does not affect the production of infectious virions  
511 in single round infections.

512

### 513 **Nelfinavir inhibits HAdV-C egress**

514 We investigated the kinetics of HAdV-C2-dE3B-GFP production and the release to the  
515 supernatant. Supernatants and whole cell lysates of treated- and non-treated infected cells were  
516 harvested at different time points. Unperturbed cells started to lyse 44 hpi, second-round  
517 infections were well advanced to plaques at 72 hpi, and most of the infected cells had lysed and  
518 released progeny at 120 hpi (Figure 3A). At 44 hpi, cell lysates of Nelfinavir- and control-treated  
519 cells contained similar infectivity, and supernatants were essentially free of virus, as shown by  
520 titration on naive A549 cells. At 72 hpi, supernatants of Nelfinavir-treated cells contained no  
521 infectious virus, while the supernatant of non-treated cells contained infectious particles. Similar  
522 findings were made at 120 hpi comparing the supernatant of cells treated with 3  $\mu$ M Nelfinavir to  
523 non-treated cells. The difference in infectious load was confirmed by titration of supernatants from  
524 separate time course experiments at three different concentrations of Nelfinavir (Figure 3B). At  
525 7 dpi, a dosage of 1.25  $\mu$ M reduced the total yield of infectious particles in the supernatant by  
526 three orders of magnitude, underscoring the potency of Nelfinavir to block the dissemination of  
527 HAdV-C-dE3B-GFP. Moreover, Nelfinavir limited HAdV-C2 transmission when added as late as  
528 40 hpi (Figure 3C). These findings indicate that Nelfinavir impairs the egress of progeny from the  
529 host cell.

530

531 We next assessed the duration of the Nelfinavir block against HAdV-C2 infection transmission.  
532 We detected strongly reduced numbers of infected nuclei and plaques in cells treated with 3  $\mu$ M  
533 Nelfinavir at infection concentrations up to 100 pfu/well at 95 hpi, (Figure 3D). Remarkably, HAdV-  
534 C2-dE3B-GFP formed delayed plaques in presence of Nelfinavir, starting at 4 dpi (Figures 3E,  
535 3F). These late plaques showed a strikingly round morphology, which was calculated to be  
536 significantly different from the comet-shaped plaques early in infection of control cells (Figure 3G).  
537 The direction of the comet tail of lytic plaques can be aligned by tilting of the incubation plate  
538 (Yakimovich et al., 2012). Thereby, the cell monolayer is positioned non-orthogonally to the vector  
539 of thermal convection flux of the liquid cell culture medium. While the direction of the comet-  
540 shaped plaques could be aligned using this method in the non-treated infections, the late  
541 Nelfinavir plaques remained mostly round (Supplementary Figures 2A-C). Moreover, there was  
542 no correlation between the size of the plaques and their roundness irrespective of Nelfinavir up  
543 to 7 dpi, demonstrating that the round plaques did not change morphology over time (Supplemen-  
544 tary Figure 2D). Collectively, the data indicate that virus transmission in presence of Nelfinavir is  
545 not driven by the bulk current of cell free medium.

546

### 547 **HAdV inhibition by Nelfinavir depends on ADP**

548 ADP is expressed at high levels late in infection and enhances cell lysis (Tollefson et al., 1992,  
549 1996b). To test if ADP was required for Nelfinavir inhibition of lytic spread, we generated an ADP-  
550 depleted HAdV-C2-dE3B-GFP mutant, HAdV-C2-dE3B-GFP-dADP. The mutant completely lacks

551 ADP expression, as indicated by immunofluorescence and Western blot experiments (Supple-  
552 mentary Figure 3A, 3B). HAdV-C2-dE3B-GFP-dADP formed particles indistinguishable from  
553 HAdV-C2-dE3B-GFP, as indicated by negative stain EM (Supplementary Figure 3C). HAdV-C2-  
554 dE3B-GFP-dADP showed a delayed onset of plaque formation by about 1 day, compared to  
555 HAdV-C2-dE3B-GFP (Figure 4A). These data are in agreement with previous kinetic studies with  
556 the ADP deletion mutant HAdV-C dl712 (Tollefson et al., 2003) (see also Supplementary Figure  
557 3A). HAdV-C2-dE3B-GFP-dADP plaques were comet-shaped, albeit their comet-heads appeared  
558 bigger and more dense (Figure 4A). While the parental virus was highly sensitive to Nelfinavir,  
559 HAdV-C2-dE3B-GFP-dADP required much higher concentrations of the compound to show  
560 inhibition of plaque formation (Figure 4B, Supplementary Table 2). In accordance, the ADP-  
561 deleted virus induced cell death independent of Nelfinavir, unlike the ADP-expressing virus, as  
562 concluded from cell impedance measurements with xCELLigence (Figure 4C, Supplementary  
563 Figures 3D, 3E). Finally, HAdV-C2-dE3B-GFP-dADP exhibited a strongly diminished separation  
564 of anti-viral efficacy from toxicity, as indicated by reduced  $TI_{50}$  values compared to the parental  
565 virus, for example 2.1 versus 66.8 with A549 cells, 8.9 versus 61.0 with HeLa cells, and 4.6 versus  
566 55.2 with HBEC cells (Figure 4D). These effects were in agreement with similar experiments  
567 performed with the previously described ADP-knock out mutant dl712 and the parental rec700,  
568 an HAdV-C5/2 hybrid virus (Deutscher et al., 1985; Tollefson et al., 1996b). The data are shown  
569 in (Supplementary Figures 3F to 3H). Together, the results show that the selective antiviral effects  
570 of Nelfinavir are more cell-type dependent in case of HAdV lacking ADP than in ADP-expressing  
571 viruses, and the effects are comparatively small for viruses lacking ADP.

572  
573 Finally, we performed immunofluorescence experiments with HAdV-C2-dE3B-GFP-infected A549  
574 cells at 44 hpi (Figure 4E). Under non-perturbed conditions, ADP accumulated in cytoplasmic foci  
575 and the nuclear envelope. Nelfinavir treatment did not affect the overall ADP expression levels  
576 nor the amount of ADP in the nuclear periphery, including the nuclear envelope, but completely  
577 abolished the cytoplasmic ADP foci as indicated by granularity quantifications (Figure 4E, right  
578 graph). Intriguingly, Tollefson and co-workers observed earlier that ADP lacking luminal O-  
579 glycosylation sites did not localize to large cytoplasmic granules and the corresponding HAdV-C  
580 mutant pm734.4 was non-lytic (Tollefson et al., 2003). We speculate that the localization of ADP  
581 in cytoplasmic organelles, such as Golgi compartments, where O-glycosylation occurs (Reily et  
582 al., 2019), could enhance the cell lytic function of ADP. Together, the data show that ADP is a  
583 major susceptibility factor for inhibition of HAdV-C infection spread by Nelfinavir.

584

### 585 **A round non-lytic plaque phenotype in HAdV-C infection**

586 Viruses are transmitted between cells by three major mechanisms, cell-free through the extra-  
587 cellular medium, directly from cell-to-cell, or in an organism by means of infected motile cells or  
588 fluid flow in blood or lymphoid vessels. This can result in far-reaching or mostly local virus disse-  
589 mination (for a simplified cartoon, see Figure 5A). In cell culture, HAdV-C transmission from a lytic  
590 infected cell (staining PI-positive) yields comet-shaped infection foci due to convective passive  
591 mass flow in the cell culture medium (Yakimovich et al., 2012, 2015), consistent with lytic HAdV-  
592 C infection (Doronin et al., 2003; Tollefson et al., 1996b). In accordance, neutralizing antibodies  
593 against HAdV-C2 added to the cell culture medium suppressed the comet-shaped plaques of

594 HAdV-C2-dE3B-GFP, and yielded confined, predominantly round-shaped infection foci 4 dpi, akin  
595 to Nelfinavir-treated infections (Figure 5B).

596  
597 To test if round-shaped infection foci (plaques) occurred in regular HAdV-C2-dE3B-GFP  
598 infections, we analysed A549 cells infected with less than 1 plaque forming unit(s) (pfu) per well  
599 in 160 wells of 96-well formats up to 8 dpi. Thirty three wells developed a single plaque, and 24  
600 of them contained fast emerging comet-shaped plaques (Figure 5C, upper panel), while nine  
601 developed delayed round plaques starting 6 dpi (Figure 5D, lower panel). The originally infected  
602 cell (indicated by the pink arrow), which gave rise to the comet-shaped plaque, disappeared  
603 between 2 and 3 dpi. In contrast, the infected cell giving rise to the round plaque (orange arrow)  
604 remained GFP-positive and apparently viable when the surrounding cells were infected. These  
605 data suggest that HAdV-C2 utilizes both lytic and non-lytic transmission, the former involving cell-  
606 free transmission, and the latter cell-associated transmission.

### 607 608 **Nelfinavir has a broad anti-HAdV spectrum**

609 We finally assessed the inhibition breadth of Nelfinavir against various HAdV types from species  
610 A, B, C and D in different human cell lines, as well as mouse adenovirus (MAdV) 1 and 3 in mouse  
611 rectum carcinoma CMT93 cells. To balance statistical significance and automated plaque seg-  
612 mentation, we first determined the optimal amount of inoculum and duration of infection for each  
613 virus and cell line. The resulting  $TI_{50}$  values of Nelfinavir were heterogeneous for different HAdV  
614 types, as determined in A549 cells (Figure 6A, for details see Supplementary Table 2). While all  
615 the tested HAdV-C types as well as HAdV-B14 showed high  $TI_{50}$ s ( $>10$ ) ranging from 12.22  
616 (HAdV-C1) to 71.09 (HAdV-C2). Members of HAdV species A, D and most of the HAdV-B types  
617 showed intermediate (2 - 10) to low Nelfinavir susceptibility ( $<2$ ), notably HAdV-B7 and B11 with  
618  $TI_{50}<1$ . MAdV-1 and 3 also showed low susceptibility. Noticeably, a high susceptibility of HAdV-C  
619 was consistently observed in human lung epithelial carcinoma (A549) cells, human epithelial  
620 cervix carcinoma (HeLa) cells, immortalized primary normal human corneal epithelial (HCE) cells  
621 as well as normal human bronchial epithelial (HBEC) cells. The corresponding  $TI_{50}$  values were  
622 in the same range as for herpes simplex virus (HSV) 1, for which Nelfinavir was reported to be an  
623 egress inhibitor (Gantt et al., 2011, 2015; Kalu et al., 2014).

624  
625 We finally examined the plaque morphologies in non-perturbed infections by immunofluorescence  
626 staining of the late proteins VI and hexon, as well as macroscopic analyses of crystal violet stained  
627 dishes for classical plaques (Figure 6B). Viruses that were highly susceptible to Nelfinavir  
628 (exhibiting high  $TI_{50}$  values) formed exclusively comet-shaped plaques. Viruses with low  $TI_{50}$   
629 values, such as A31, B11 or D37 had a high fraction of round plaques, even when infected with  
630 more than 1 pfu / well. This demonstrates that the slowly growing round infection foci observed in  
631 fluorescent microscopy gave similarly shaped lesions due to cytotoxicity, akin to the lytic comet-  
632 shaped foci. We conclude that HAdV types employ lytic cell-free and non-lytic cell-to-cell trans-  
633 mission modes and give rise to different plaque phenotypes.

## 634 Discussion

635

636 A phenotypic screen of the PCL identified Nelfinavir as a potent, post-exposure inhibitor of HAdV-  
637 C2-dE3B-GFP plaque formation in cell culture (Georgi et al., 2020). Nelfinavir is a non-nucleoside  
638 class inhibitor against a range of HAdV types. Surprisingly, we found Nelfinavir to inhibit HAdV  
639 infection, although Nelfinavir was previously classified as inactive against HAdV-C based on  
640 replication assays (Gantt et al., 2011). It is the off-patent FDA-approved active pharmaceutical  
641 ingredient of Viracept. Nelfinavir was originally developed as an inhibitor against the HIV aspartyl  
642 protease. It is orally bioavailable, with an inhibitory concentration in the low nanomolar range  
643 (Kaldor et al., 1997; Moyle et al., 1998). Nelfinavir inhibits the replication of enveloped viruses,  
644 including SARS coronavirus (Yamamoto et al., 2004), hepatitis C virus (Toma et al., 2009) as well  
645 as  $\alpha$ -,  $\beta$ - and  $\gamma$ -herpes viruses (Gantt et al., 2011). In the case of the  $\alpha$ -herpes virus HSV-1,  
646 Nelfinavir inhibits the envelopment of the capsid with cytoplasmic membranes (Gantt et al., 2011,  
647 2015; Kalu et al., 2014). Nelfinavir was reported to inhibit the activity of regulatory proteases in  
648 the Golgi, the growth of cancer cells and to induce a wealth of other effects, including autophagy,  
649 ER stress, the unfolded protein response, and apoptosis (Caron et al., 2003; Chow et al., 2006;  
650 Gills et al., 2007; Guan et al., 2011, 2012, 2015; Yang et al., 2005) (reviewed in Bernstein and  
651 Dennis, 2008; Brüning et al., 2010; Chow et al., 2009; Koltai, 2015; Shim and Liu, 2014).

652

653 Here, we demonstrate that Nelfinavir inhibits the egress of HAdV particles without perturbing other  
654 viral replication steps including entry, assembly and maturation. Morphometric analyses of the  
655 fluorescent plaques indicated that HAdV-C propagates by two distinct mechanisms, lytic and non-  
656 lytic. Lytic transmission led to comet-shaped convection driven plaques, whereas non-lytic trans-  
657 mission gave rise to symmetric round-shaped plaques. Nelfinavir specifically suppressed the lytic  
658 spread of HAdV, most prominently the HAdV-C types and B14, but not other HAdV, such as A31  
659 or D37. Incidentally, HAdV-C and B14 replicate to considerable levels in Syrian hamsters, where-  
660 as other HAdV types do not (Radke et al., 2016; Tollefson et al., 2017; Wold et al., 2019). We  
661 infer that lytic infection could be a pathogenicity driver, at least in the hamster model.

662

663 The molecular mechanisms underlying cell lysis in AdV infection are not well understood, largely  
664 due to the lack of specific assays and inhibitors. Single cell analyses combined with machine  
665 learning start to identify specific features of lytic cells, such as increased intra-nuclear pressure  
666 compared to non-lytic cells (Andriasyan et al., 2019). The lysis induced by HAdV was suggested  
667 to involve caspase-dependent functions, and necrosis-like features (Abou El Hassan et al., 2004;  
668 Yun et al., 2005; Zou et al., 2004). The best characterized factor in HAdV cell lysis is ADP, a small  
669 membrane protein encoded in HAdV-C (Davison et al., 2003a, 2003b; Robinson et al., 2013).  
670 ADP-deletion mutants show delayed onset of plaque formation (Tollefson et al., 1996a, 1996b).  
671 Lysis is enhanced by increased ADP levels and tuned by post-translational ADP processing  
672 (Doronin et al., 2003; Tollefson et al., 1996a, 1996b). ADP has a single signal/anchor sequence,  
673 and its luminal domain is N- and O-glycosylated. The N-terminal segment is cleaved off in the  
674 Golgi lumen, and the membrane-anchored ADP localizes to the inner nuclear membrane (Scaria  
675 et al., 1992; Tollefson et al., 1996b, 2003). Interestingly, two cysteine residues in the cytoplasmic  
676 domain adjacent to the transmembrane segment are palmitoylated (Tollefson et al., 2003)



677 (Hausmann et al., 1998). S-palmitoylation is known to support anchorage and sorting of host and  
678 viral membrane proteins. Accordingly, S-palmitoylation in the Golgi facilitates protein oligomeri-  
679 zation, virion assembly and entry, as shown for structural proteins of enveloped viruses, including  
680 SARS-CoV-1 S, vesicular stomatitis virus G, sindbis virus E2, influenza virus HA, respiratory  
681 syncytial virus F, or rubella virus E1 and E2, as well as viroporin-mediated membrane  
682 permeabilization, including mouse hepatitis virus E protein, SARS-CoV-1 E protein and sindbis  
683 virus 6K. For reviews, see (Blaskovic et al., 2013; Veit, 2012).

684  
685 Conspicuously, the cell lysis defective HAdV mutant pm734.4 encodes a C2 mutant ADP with two  
686 point mutations in the transmembrane domain, C<sub>53</sub>R and M<sub>56</sub>L (Tollefson et al., 2003). The mutant  
687 ADP localizes to the ER and the nuclear envelope, but not the Golgi, unlike the parental wild type  
688 virus rec700. The localization of the pm734.4 ADP is akin to the localization of HAdV-C2 ADP in  
689 Nelfinavir-treated cells, which resist lysis and lack ADP localization in the Golgi. We speculate  
690 that the palmitoylation of ADP in the Golgi is crucial for ADP to enhance the rupture of the nuclear  
691 membrane in lytic HAdV-C egress. Nelfinavir may interfere with ADP palmitoylation either by  
692 inhibiting a palmitoyl-acyltransferase or by dispersing the donor substrate for protein palmitoyla-  
693 tion, palmitoyl-coenzyme A (Blaskovic et al., 2013). Remarkably, Nelfinavir has a high logP value,  
694 4.1 to 4.68 (Longer et al., 1995; Tetko et al., 2005), and partitions into lipophilic domains of the  
695 cell, including membranes. This is akin to another lipophilic drug with pleiotropic effects, the anti-  
696 viral and anti-helminthic compound Niclosamide, which is a weak acid and acts as a protonophore  
697 extracting protons from acidic organelles, and thereby inhibits virus entry and uncouples mito-  
698 chondrial proton gradients (Fonseca et al., 2012; Jurgeit et al., 2012).

699  
700 We noticed that ADP is not the sole lysis factor of HAdV. HAdV types lacking ADP, such as B  
701 types, also release their progeny by lysis, albeit with efficacies that vary depending on the cell  
702 type (Baker et al., 2019; Chen et al., 2011a; Uchino et al., 2014). This is in agreement with the  
703 observation that HAdV types of the A, B and D species form comet-shaped plaques, and that  
704 ADP-deleted HAdV-C2 lyse the host cell, and form comet-shaped plaques, albeit delayed and  
705 with lower efficacy than ADP-containing rec700 or HAdV-C2-dE3B-GFP.

706  
707 In addition to providing a new inhibitor of lytic HAdV propagation, Nelfinavir revealed an alternative  
708 non-lytic HAdV transmission pathway, which gives rise to slow-growing symmetrical plaques. This  
709 non-lytic pathway exists in unperturbed cells, but is camouflaged by the rapid and far-reaching  
710 lytic infection. Non-lytic egress from the nucleus bypasses the nuclear envelope and the plasma  
711 membrane. We speculate that the non-lytic pathway involves sorting of HAdV particles to  
712 membrane sites where outward budding and scission occur. HAdV budding through the nuclear  
713 envelope could involve the WASH complex, akin to nuclear release of large RNPs in *Drosophila*,  
714 and perhaps similar to HSV budding (Hagen et al., 2015; Verboon et al., 2019). Cytoplasmic  
715 membrane budding could be enhanced by the ESCRT complex, which is known to release  
716 enveloped viruses, such as HIV, and also facultative-enveloped viruses, such as hepatitis A virus  
717 (Feng et al., 2013; Hurley, 2015; Lippincott-Schwartz et al., 2017). Alternatively, autophagy could  
718 sequester virions from the nucleus and upon fusion with the plasma membrane release virions  
719 from infected cell.

720

721 In conclusion, our work opens new therapeutic options for treating adenovirus disease, including  
722 acute and persistent infections. For example, HAdV-C persists in lymphocytes, which resist lytic  
723 infection, but also in epithelial cell lines under the repression of interferon and activation of the  
724 unfolded protein response sensor IRE-1a (Garnett et al., 2002; Kosulin et al., 2016; Murali et al.,  
725 2014; Prasad et al., 2014, 2020b; Zheng et al., 2016). Nelfinavir might be considered for anti-  
726 HAdV therapy, for example prophylactically in hematopoietic stem cell recipients, whose life is  
727 threatened by reactivation of HAdV-C (Hiwarkar et al., 2018; Lion, 2019; Lynch and Kajon, 2016).

728 **Contributions**

729 UFG, VA and AY conceived the project. FG, VA, RW, LY, MG and NM performed experiments.  
730 FG, VA, RW, LM, FK, VP, AY, GT, UFG analysed data. SH contributed essential viruses. FG and  
731 UFG wrote the manuscript.

732

733 **Acknowledgements**

734 We thank Anja Ehrhardt for providing the HAdV-C-neutralizing dog serum. William SM Wold and  
735 Anne Tollefson kindly provided the  $\alpha$ -ADP antibodies and ADP mutant viruses. Albert Heim  
736 provided HAdV-B14 and 21, Maarit Suomalainen provided HAdV-C2 and C5, discussions and  
737 advice. Yohei Yamauchi contributed Influenza A virus H1N1 virus and Cornel Fraefel the HSV-1-  
738 CMV-GFP. Vibhu Prasad kindly supported the impedance experiments. We are grateful for  
739 scientific discussions with Ivo Sbalzarini. We thank the Center for Microscopy and Image Analysis  
740 (ZMB) at UZH providing the EM instrumentation. We thank the members of the Greber lab for  
741 constructive discussions.

742

743 **Conflict of interest**

744 The authors declare no conflict of interest.

745

746 **Funding**

747 We acknowledge the financial support from the Swiss National Science Foundation (UFG,  
748 31003A\_179256 / 1), and the National Research Program “NCCR chemical biology” supported  
749 by the Swiss National Science Foundation (GT, UFG).

750

751 **Abbreviations**

752 ADP, adenovirus death protein;  
753 AdV, adenovirus;  
754 CAR, coxsackievirus adenovirus receptor;  
755 CMV, cytomegalovirus;  
756 DFT, 3'-Deoxy-3'-fluorothymidine;  
757 DMEM, Dulbecco's Modified Eagle medium;  
758 dpi, day(s) post infection;  
759 EC<sub>50</sub>, 50% effective concentration;  
760 GFP, green fluorescent protein;  
761 HAdV, human adenovirus;  
762 HIV, human immunodeficiency virus;  
763 hpi, hour(s) post infection;  
764 HSV, herpes simplex virus;  
765 kbp, kilo base pairs,  
766 MAdV, mouse adenovirus;  
767 o/n, over night;  
768 ORF, open reading frame;  
769 Nelfinavir Mesylate, Nelfinavir;  
770 pBI, pBluescript;  
771 PCL, Prestwick Chemical Library;

772 PFA, para-formaldehyde;  
773 pfu, plaque forming unit(s);  
774 pi, post infection;  
775 PI, propidium iodide;  
776 RT, room temperature;  
777 SE, standard error;  
778 SD, standard deviation;  
779 TC<sub>50</sub>, 50% toxic concentration;  
780 TI, therapeutic index;  
781 ts, temperature-sensitive;  
782 VP, viral particles;  
783 wt, wild type

784 **Figures**

785

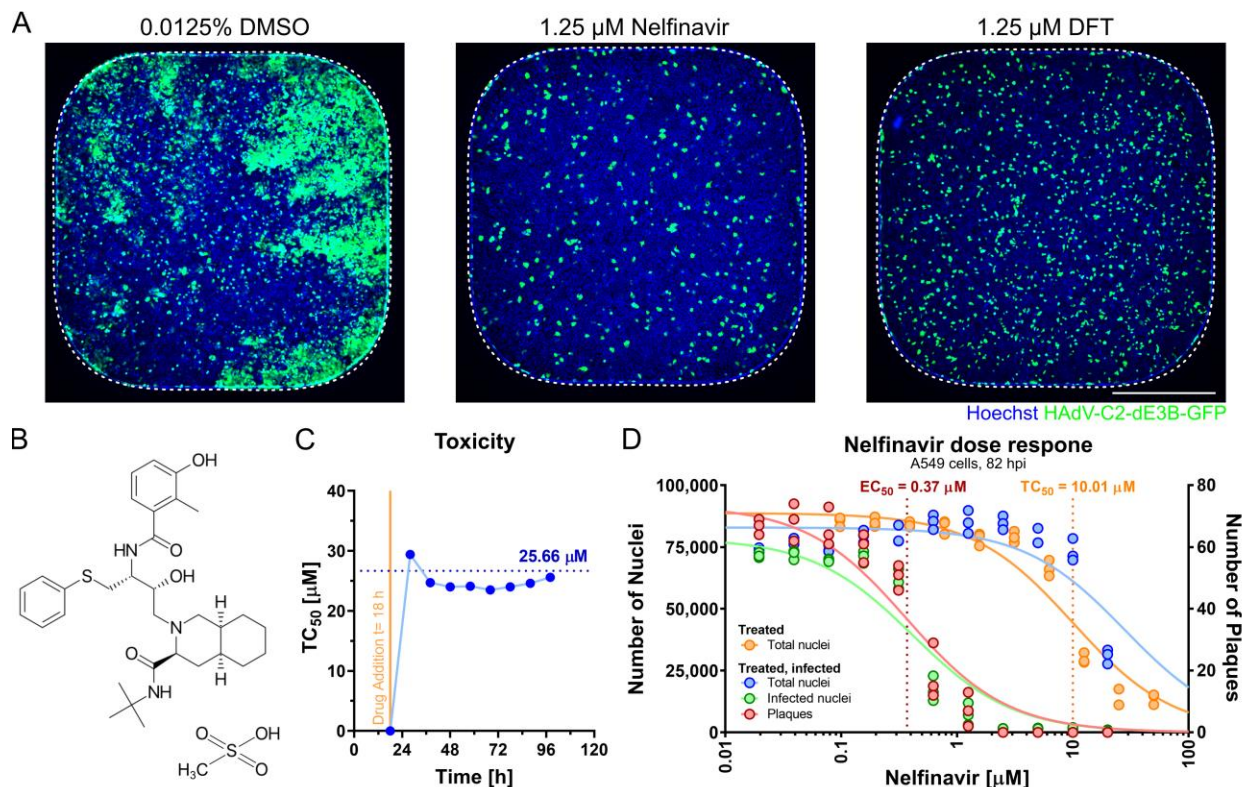

786

787 **Figure 1: The small molecule Nelfinavir is a potent inhibitor of HAdV-C infection.**

788

789 **A** Representative 384-well epifluorescence microscopy images of cells treated with DMSO (left), Nelfinavir  
790 (centre) and DFT (right), and infection with HAdV-C2-dE3B-GFP for 72 h. Hoechst-stained nuclei are shown  
791 in blue, viral GFP in green. Dotted lines indicate well outline. Scale bar is 5 mm.

792 **B** Structural formula of Nelfinavir Mesylate.

793 **C** Cell index (CI)-based concentration causing 50% toxicity in uninfected cells (TC<sub>50</sub>) upon long-term  
794 incubation of A549 with Nelfinavir. Impedance was recorded every 15 min using an xCELLigence system.  
795 The time on the x-axis indicates hours after cell seeding. Vertical line shows the time of drug addition (raw  
796 data available in Supplementary Figure 1).

797 **D** Separation of effect (EC<sub>50</sub>, plaque numbers) and toxicity (TC<sub>50</sub>, nuclei numbers) of Nelfinavir in A549 cells  
798 at 82 hpi based on four technical replicates. Plaque numbers per well are depicted as red circles, and  
799 numbers of infected nuclei as green circles. Numbers of nuclei in Nelfinavir-treated, uninfected wells are  
800 shown in blue; treated, infected wells shown in orange.



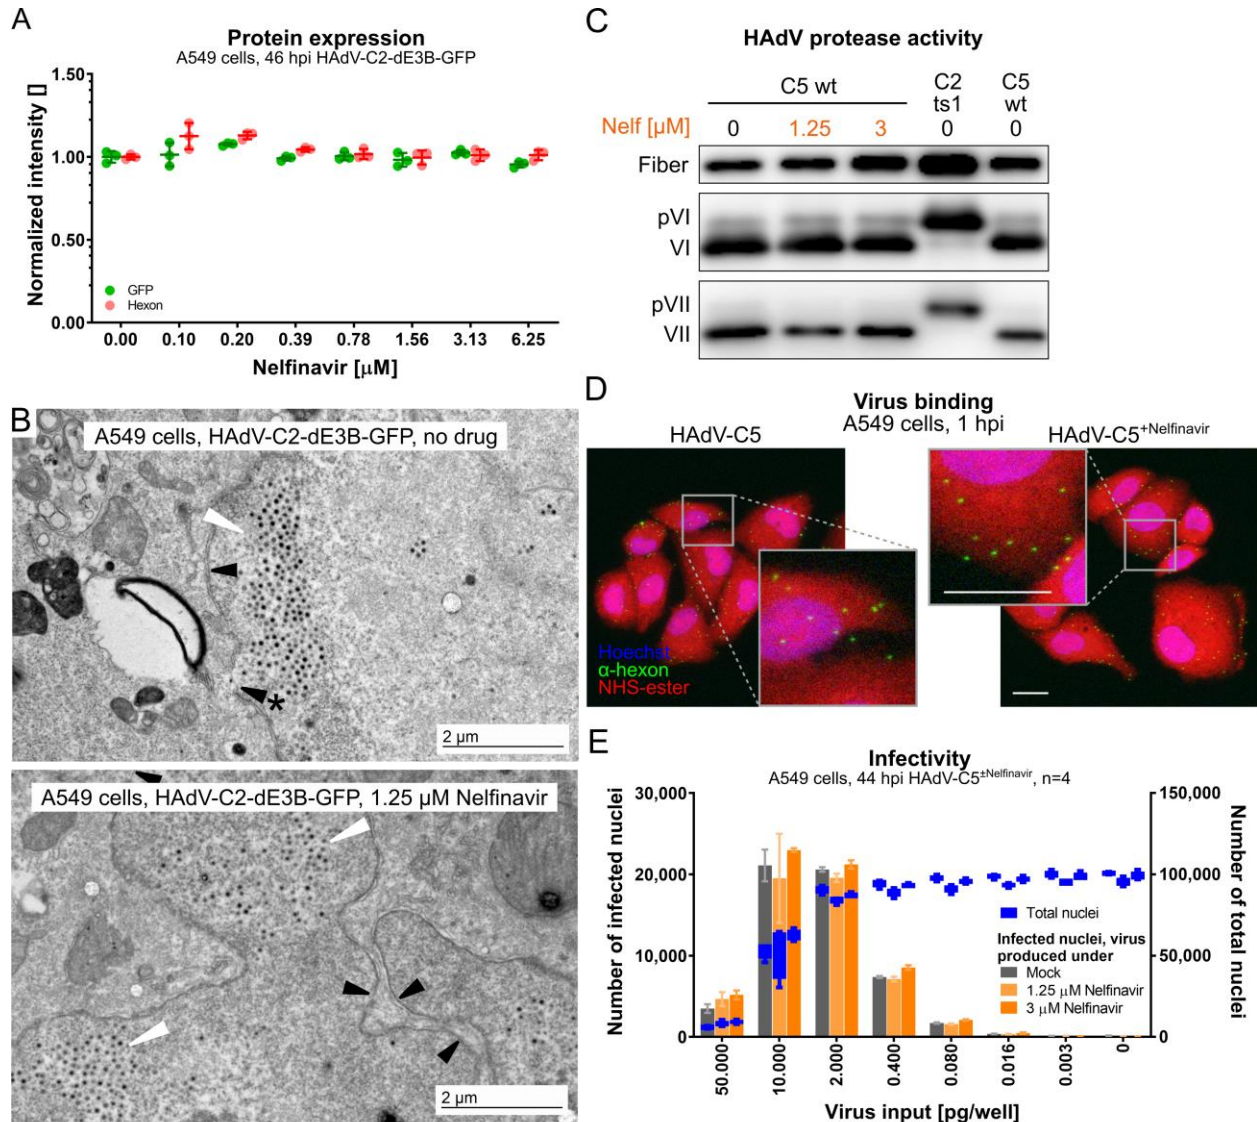

801  
802 **Figure 2. Nelfinavir does not affect early or late steps of HAAdV-C infection.**

803  
804 **A** No effects of Nelfinavir on the expression level of CMV-GFP (green) or the late HAAdV protein hexon (red)  
805 in HAAdV-C2-dE3B-GFP-infected A549 cells. Data points represent for each of the four biological replicates:  
806 mean median, nuclear intensities per well normalized to the mean median nuclear intensities of the DMSO-  
807 treated wells. Epifluorescence microscopy images were segmented and analysed using CellProfiler.

808 **B** Representative TEM images of late stage HAAdV-C2-dE3B-GFP-infected A549 cells at 41 hpi reveal viral  
809 particles inside the nucleus in both DMSO-treated and Nelfinavir-treated cells (white arrow head). Black  
810 arrow heads indicate the nuclear envelope, arrow head with \* points to rupture. Scale bar equivalent to  
811 2 μm.

812 **C** Nelfinavir does not affect the maturation of HAAdV-C5, as indicated by fully processed VI and VII proteins  
813 in purified particles grown in presence of Nelfinavir. Note that HAAdV-C2-ts1 lacking the L3/p23 protease  
814 contains the precursor capsid proteins of VI and VII (pVI and pVII).

815 **D** HAdV-C5 grown in presence of Nelfinavir (HAdV-C5<sup>+Nelfinavir</sup>) binds to naive A549 cells similar as HAdV-  
816 C5 from control cells. Cells were incubated with virus at 4°C for 1 h and fixed with PFA. Staining with  
817 Hoechst (blue nuclei) and for virus capsids with an  $\alpha$ -hexon antibody (green puncta). Cell material was  
818 visualized by NHS-ester staining (red signal). Images are max projections of confocal z stacks, and also  
819 show zoomed in views (grey squares). Scale bars equivalent to 20  $\mu$ m.

820 **E** Particles produced in presence of Nelfinavir are fully infectious. A549 cells were inoculated with purified  
821 HAdV-C5 grown in presence or absence of Nelfinavir. Number of infected cells at 44 hpi, shown in grey  
822 and orange, were quantified based on  $\alpha$ -hexon immunofluorescence staining. Total cell numbers were  
823 segmented based on nuclear Hoechst staining (blue). Bars represent means of four technical replicates.  
824 Error bars indicate standard deviation.

825

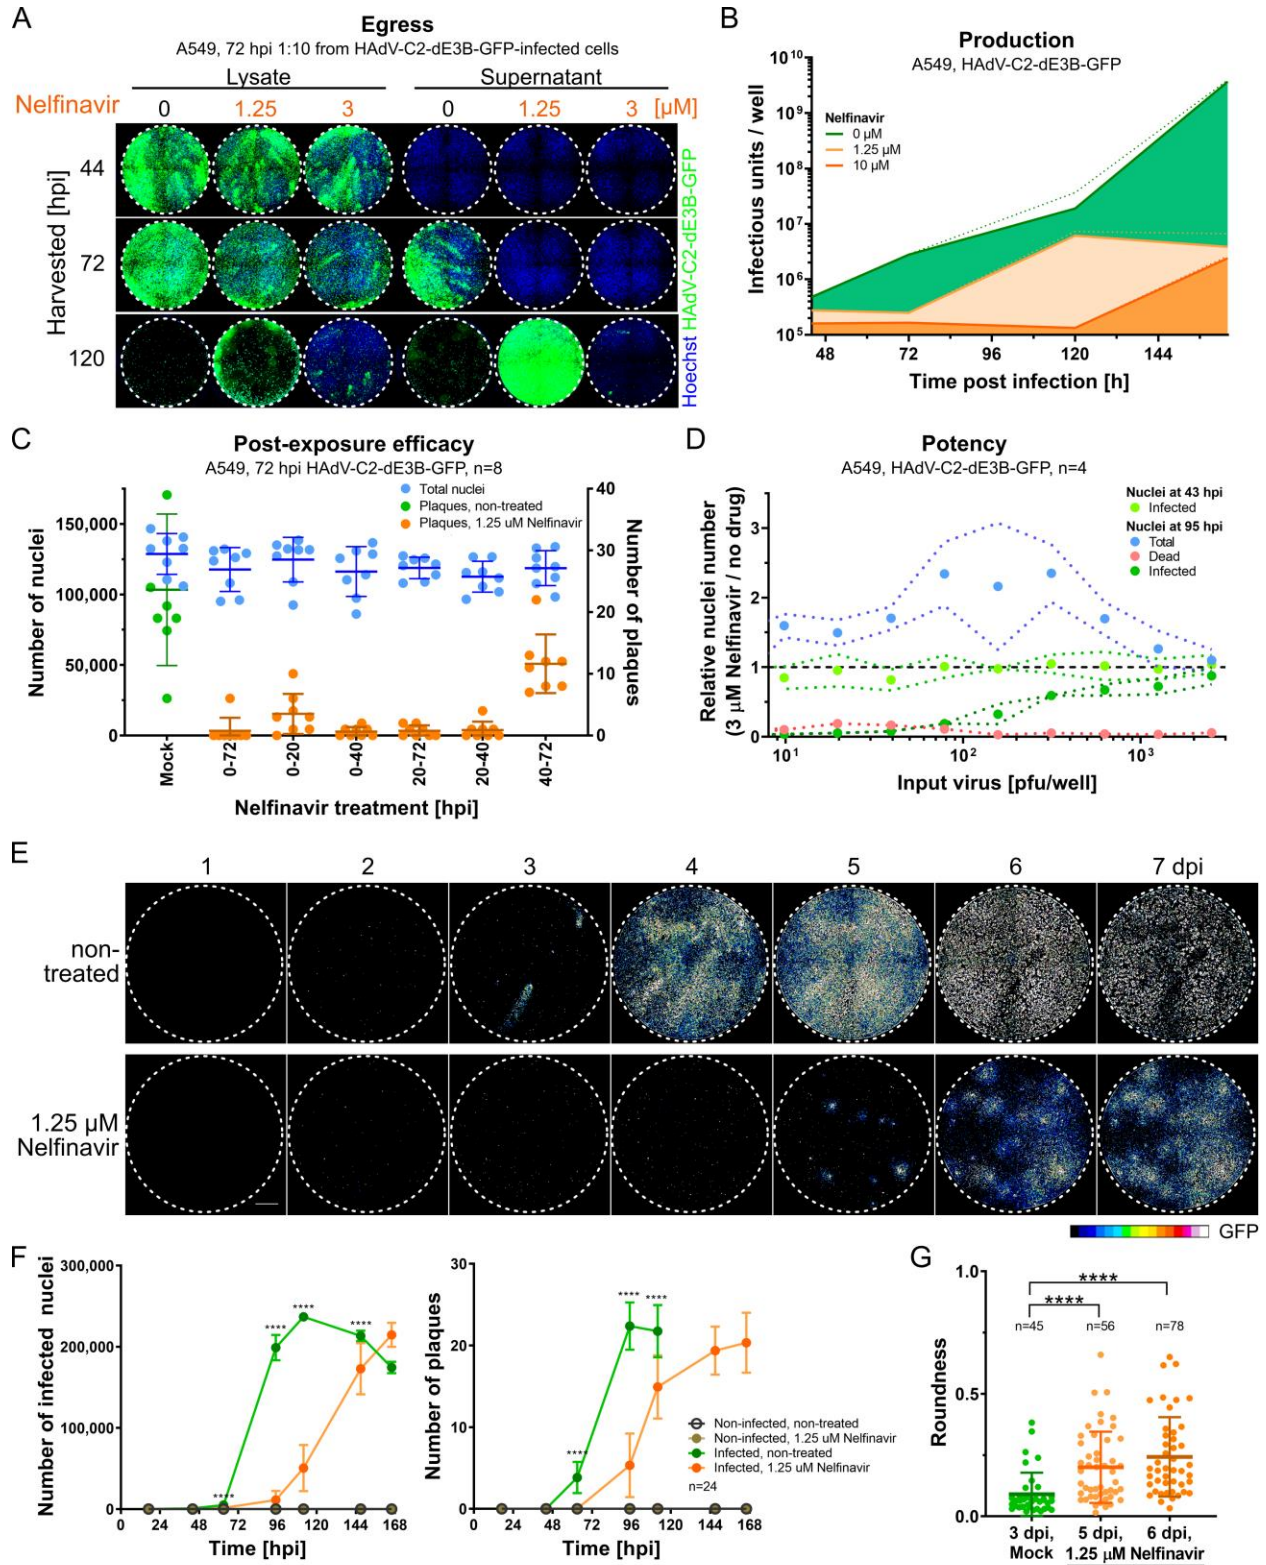

826

827

**Figure 3. Nelfinavir is a post-exposure inhibitor of HAAdV-C egress.**

828

829 **A** A549 indicator cells were inoculated with 1:10 diluted cell lysates or supernatants from Nelfinavir or  
830 control-treated A549 cells, which had been infected with HAdV-C2-dE3B-GFP for indicated durations, and  
831 incubated for 3 days. Results reveal delayed viral progeny release to the supernatant of Nelfinavir-treated  
832 cells. Nuclei signal shown in blue, viral GFP in green.

833 **B** Released and cell-associated total progeny from HAdV-C2-dE3B-GFP-infected A549 cells treated with  
834 Nelfinavir (orange) or DMSO (green) determined by titration on naive A549 cells in a 12-well assay format.  
835 Lines indicate mean slopes, dotted lines give standard error. Linear regression of three biological triplicates.

836 **C** Time-resolved emergence of plaques in HAdV-C2-dE3B-GFP-infected A549 cells treated with 1.25  $\mu\text{M}$   
837 Nelfinavir. Plaques in infected, non-treated wells shown in green, Nelfinavir-treated wells in orange and  
838 nuclei in blue. Data points represent one of eight technical replicas. Coloured vertical lines indicate means  
839 and error bars the standard deviations.

840 **D** The inhibitory effect of Nelfinavir on HAdV-C2-dE3B-GFP spread is dependent on the amount input virus  
841 during initial infection. Number of infected, GFP-positive cells shown in green at 3  $\mu\text{M}$  Nelfinavir relative to  
842 the mean infection of solvent-treated cells infected with the corresponding dosage. Total number of nuclei  
843 shown in blue, number of PI-positive dead cells in red. Note that the number of infected cells at 43 hpi is  
844 not affected by the Nelfinavir treatment. Data points represent means of four technical replicates. Dotted  
845 lines indicate standard deviation.

846 **E** Treatment of HAdV-C2-dE3B-GFP-infected A549 cells with 1.25  $\mu\text{M}$  Nelfinavir suppresses comet-shaped  
847 plaques and reveals slowly growing quasi-round plaques. Viral GFP expression levels shown as 16-color  
848 LUT. Scale bar is 1 mm.

849 **F** Nelfinavir (1.25  $\mu\text{M}$ ) inhibits HAdV-C2-dE3B-GFP infection of A549 cells by slowing plaque formation.  
850 Number of infected cells and plaques per well of DMSO-treated, infected wells are shown in green, those  
851 of Nelfinavir-treated, infected wells in orange. Data points represent means of 24 technical replicates,  
852 including the example well of the micrographs shown in **D**. Error bars indicate standard deviation. Statistical  
853 significance compared to non-treated control by Kolmogorov-Smirnov test, p value < 0.0001 (\*\*\*\*).

854 **G** The delayed HAdV-C2-dE3B-GFP plaques in presence of 1.25  $\mu\text{M}$  Nelfinavir are significantly rounder  
855 than control plaques, as indicated by Kolmogorov-Smirnov test. Data points indicate plaque regions in the  
856 well centre harbouring a single peak region. Summary of 24 technical replicates including the example well  
857 of the micrographs shown in **D**. Regions consisting of at least 5 infected cells ( $\geq 1,500 \mu\text{m}^2$ ) were considered  
858 as a plaque. Plaque morphologies in control wells could not be quantified later than 3 dpi due to rapid virus  
859 dissemination. Plaques from DMSO-treated cells 3 dpi compared to Nelfinavir-treated ones 5 dpi:  
860 approximate p value < 0.0001 (\*\*\*\*). DMSO-treated plaques 3 dpi vs. Nelfinavir-treated plaques 6 dpi:  
861 approximate p value < 0.0001 (\*\*\*\*). Statistical significance by Kolmogorov-Smirnov test.



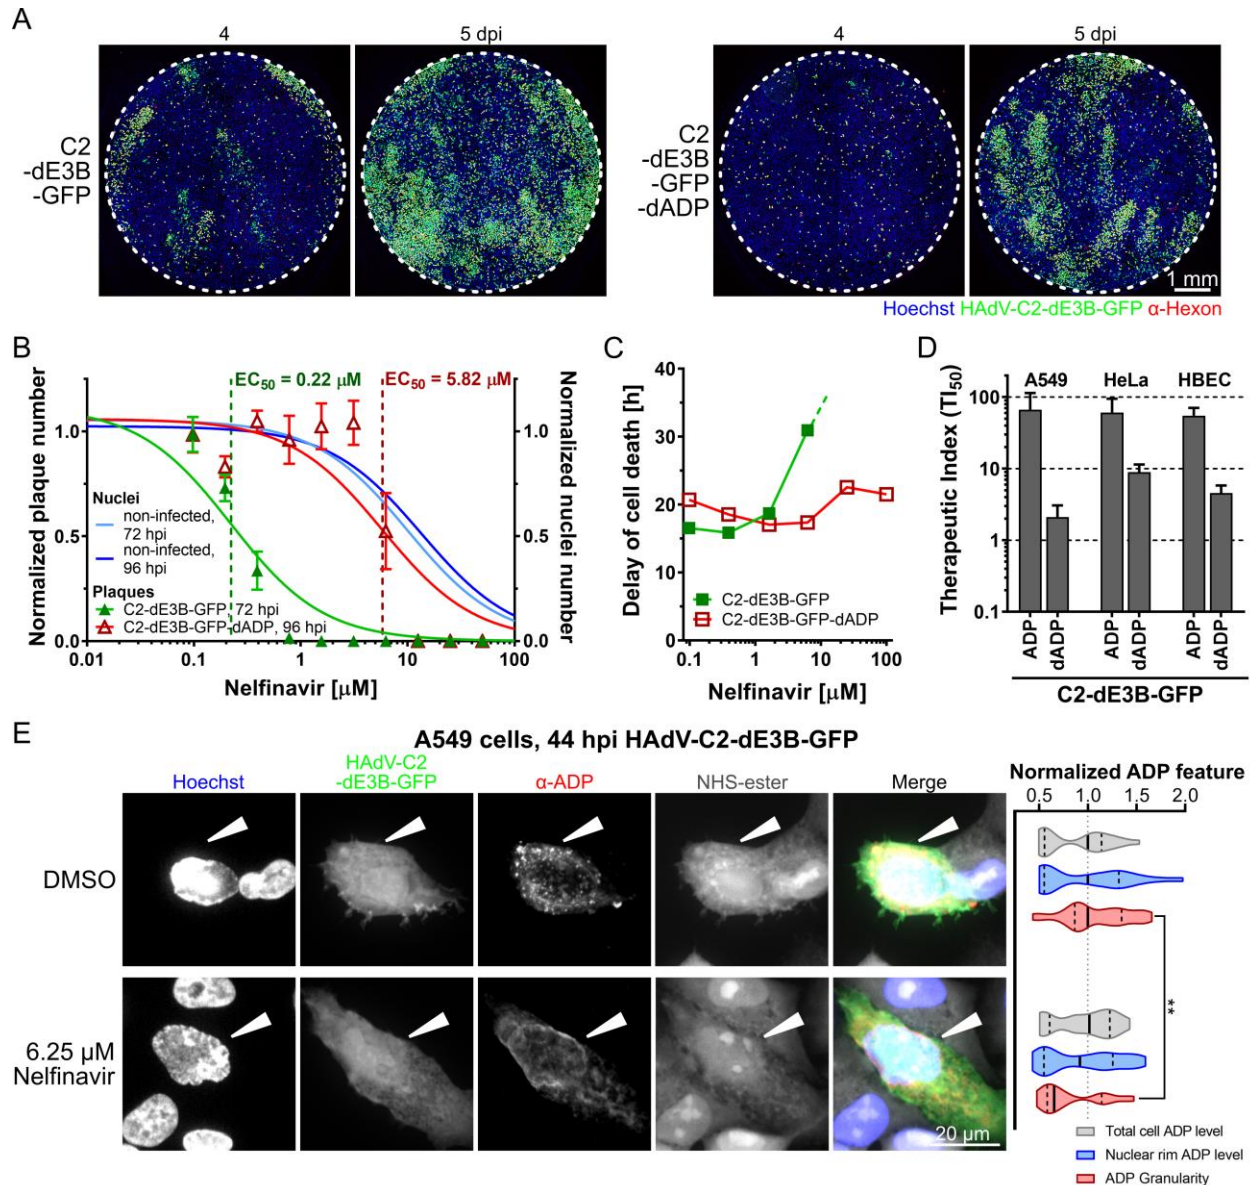

862

863

**Figure 4. ADP contributes to the inhibitory effect of Nelfinavir against HAAdV-C.**

864

865

**A** The deletion of ADP from HAAdV-C2-dE3B-GFP delayed plaque formation in A549 cells by one day, but does not change plaque shape. Cells were infected with  $1.1 \cdot 10^5$  VP/ well. GFP is in green, hexon staining red, Hoechst signal of nuclei blue. Scale bar is 1 mm.

868

**B** The deletion of ADP from HAAdV-C2-dE3B-GFP reduced the anti-viral effects of Nelfinavir in A549, with  $EC_{50} = 5.82$  compared to  $0.22 \mu\text{M}$  for the parental virus. HAAdV-C2-dE3B-GFP infection was quantified at 72 hpi, and 96 hpi for the ADP deletion mutant. Plaque numbers per well were normalized to the mean DMSO control and depicted as full green triangles for HAAdV-C2-dE3B-GFP and empty red triangles for the ADP deletion mutant. Nuclei numbers of non-infected, treated wells were normalized to the mean DMSO control and depicted as full blue circles (72 h incubation), and empty blue circles (96 h). Data points

873



874 represent means of four technical replicates. Error bars indicate standard deviation.  $EC_{50}$ s were derived  
875 from non-linear curve fitting. For detailed information and statistics, see Supplementary Table 2.

876 **C** The delay of cell death was calculated from the highest mean cell index (CI) and its half maximum for  
877 each treatment (mean of two technical replicates). HAdV-C2-dE3B-GFP data in green and dADP in red.  
878 For HAdV-C2-dE3B-GFP-infected A549 treated with 25  $\mu$ M Nelfinavir, the measurement was aborted due  
879 to overgrowth causing cytotoxicity before the maximal cell index was reached. Treatment with 100  $\mu$ M  
880 Nelfinavir was toxic.

881 **D** Therapeutic index ( $TI_{50}$ ) derived from the ratio of Nelfinavir concentration causing 50% toxicity ( $TC_{50}$ ) and  
882 the concentration leading to 50% reduction in numbers of plaques per well ( $EC_{50}$ ). Results are shown for  
883 HAdV-C2-dE3B-GFP and -dADP in different cancer and primary cells. For detailed information and  
884 statistics, see Supplementary Table 2.

885 **E** Representative high-magnification confocal images of HAdV-C2-dE3B-GFP-infected A549 cells 44 hpi  
886 showing the effect of Nelfinavir on ADP localization. Nuclei, shown in blue in the merged right-most panel,  
887 were stained with Hoechst. Viral GFP is displayed in green. ADP stained by immunofluorescence with a  
888 rabbit  $\alpha$ -HAdV-C2-ADP<sub>87-101</sub> antibody (red). Cells were stained using NHS-ester (grey scale). White arrow  
889 heads highlight infected cells. Images are max projections of 30 z planes with 0.5  $\mu$ m z step, scale bar  
890 indicates 10  $\mu$ m. Right: Quantification of total ADP expression (grey), ADP localization to the nuclear rim  
891 (blue) and ADP granularity (red) relative to the mean values from DMSO control cells. Data set is comprised  
892 of 20 Nelfinavir-treated infected cells, and 23 control cells. Solid line indicates median, dotted lines reflect  
893 5-95% quantile. Significance was tested using the Kolmogorov-Smirnov test: ADP granularity p value =  
894 0.0019 (\*\*).

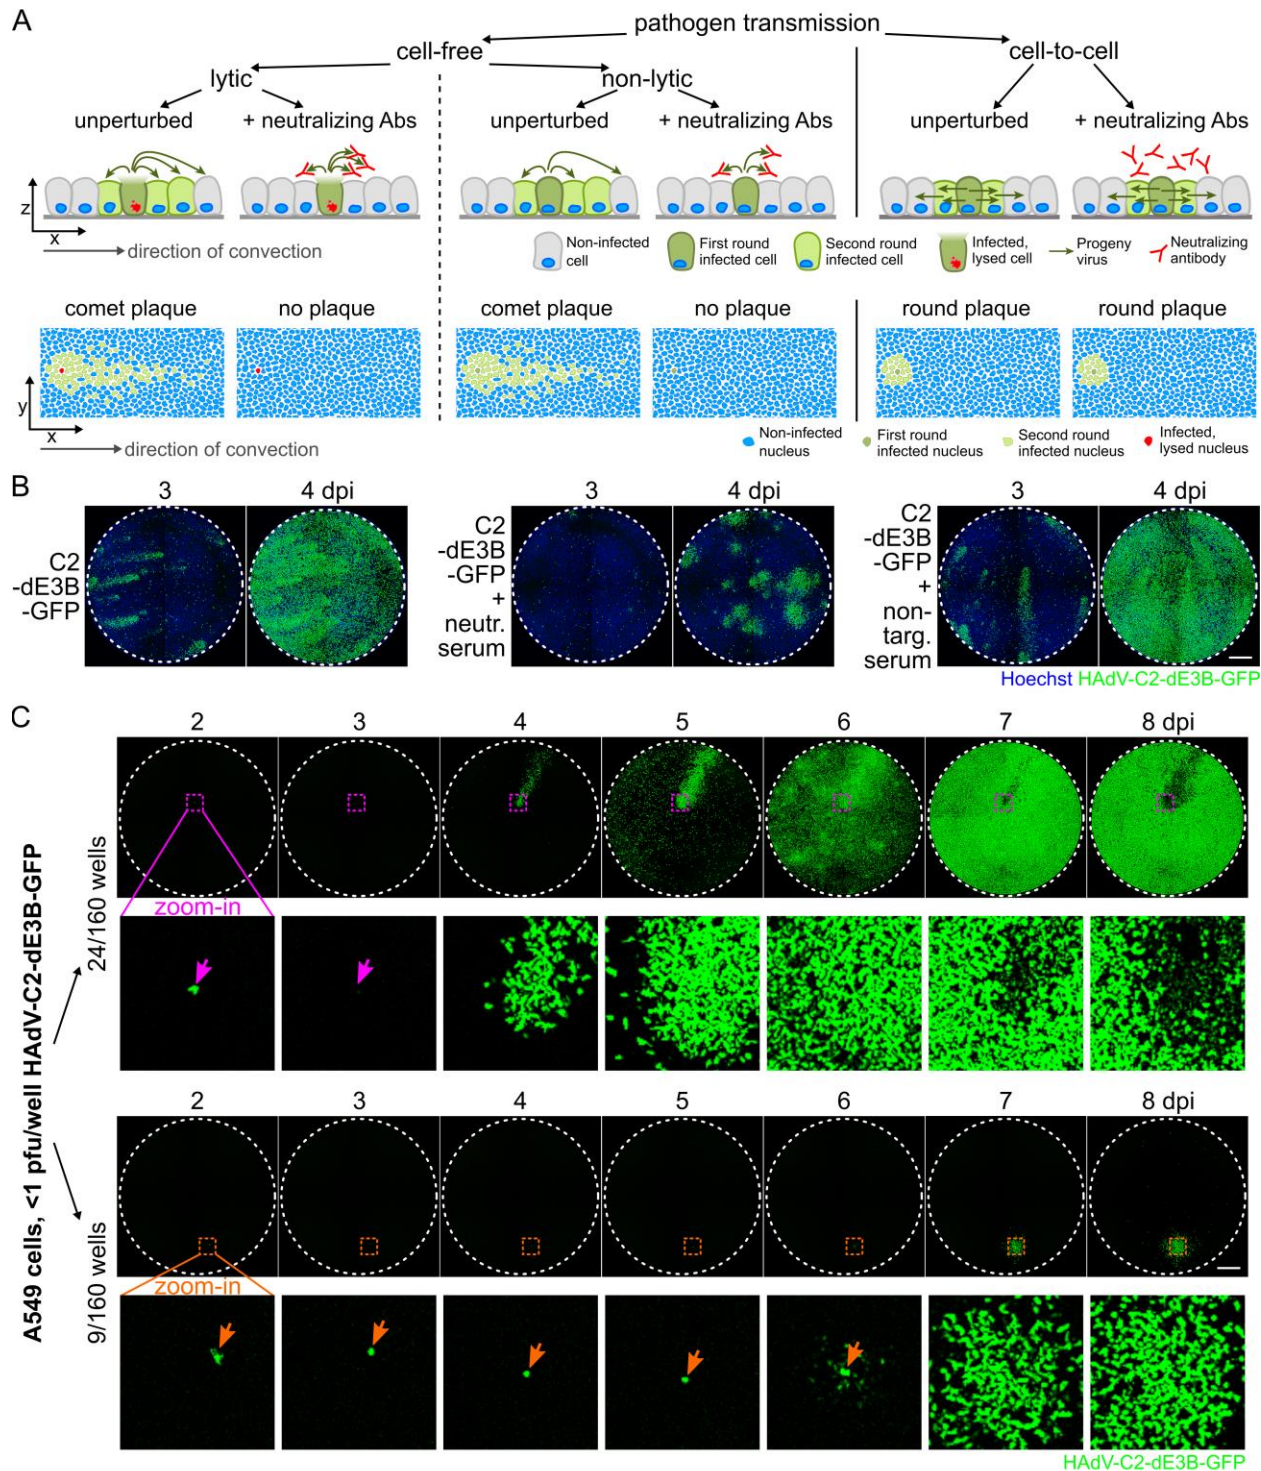

895  
 896 **Figure 5: Round plaque phenotypes in presence of neutralising anti-HAdV-C2 antibodies and in**  
 897 **unperturbed HAAdV-C2 infections.**

898  
 899 **A** Schematic overview of pathogen transmission routes in cell cultures. Cell lysis kills the donor cell and  
 900 releases progeny, while non-lytic egress maintains the infected donor cell. In both cases, convection in the

901 media leads to long-distance, comet-shaped plaques. Cell-free virus transmission is susceptible to  
902 neutralizing antibodies. In contrast, direct cell-to-cell pathogen spread from persisting first round infected  
903 host cells causes symmetric, small-growing, dense round plaques, which cannot be inhibited by neutralizing  
904 antibodies presenting the extracellular medium. Non-infected cells are shown in grey with blue nuclei. First  
905 round infected cells are shown in dark green, red nuclei contain a ruptured nuclear envelope. Second round  
906 infected cells are shown in light green. Grey arrow represents direction of convective flow. Axes indicate  
907 side or top-down view.

908 **B** Inhibition of cell-free HAdV-C2-dE3B-GFP transmission by an anti-HAdV-C2/5-neutralizing serum added  
909 to the medium at 1:10. Nuclei are shown in blue, viral GFP in green.

910 **C** Infection of A549 cells with limiting amounts of HAdV-C2-dE3B-GFP (<1 pfu/ well, 9-75 VP/ well) in 160  
911 wells gives rise to 33 single plaques / well. Twenty four wells contained GFP-positive comet-shaped plaques  
912 (upper panel), and nine developed delayed round plaques (lower panel). Dashed coloured squares indicate  
913 magnified regions of first-round infected cell below. Infected cell leading to comet-shaped plaque (upper  
914 panel, pink arrow) lyses at 3 dpi as indicated by loss of GFP signal. Infected cell giving rise to round plaque  
915 (lower panel, orange arrow) remains GFP-positive. Scale bar is 1 mm.

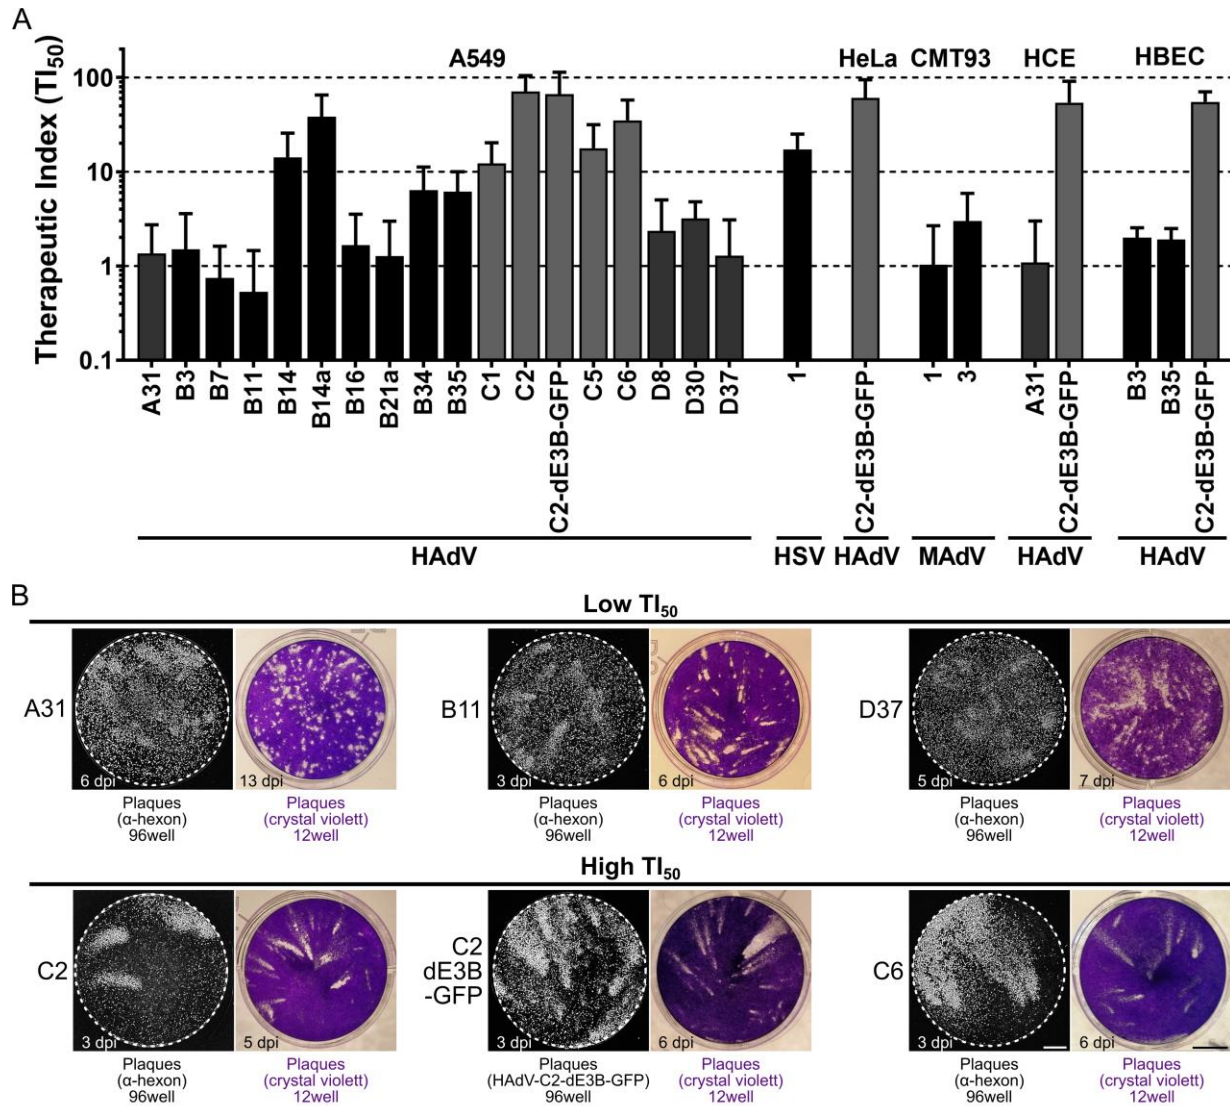

916

917 **Figure 6: Susceptibility of HAdV to Nelfinavir correlates with plaque shape.**

918

919 **A** Therapeutic index (TI<sub>50</sub>) calculated as Nelfinavir concentration causing 50% toxicity (TC<sub>50</sub>) divided by the  
 920 concentration leading to 50% reduction in numbers of plaques per well (EC<sub>50</sub>) for different HAdV, mouse  
 921 adenoviruses (MAdV) and herpes simplex virus 1 (HSV-1) in different cancer and primary cell lines. For  
 922 detailed information and statistics, see Supplementary Table 2.

923 **B** Representative microscopic and macroscopic plaque morphologies of Nelfinavir-sensitive and insensitive  
 924 HAdV types. Grey scale images show plaques based on epifluorescence microscopy of hexon  
 925 immunostaining or GFP expression in a 96-well of A549 cells infected with the indicated HAdV type. Scale  
 926 bar is 1 mm. Coloured images show infection-induced cytotoxicity yielding plaques, as visualized by crystal  
 927 violet staining in wells of a 12-well dish of A549 cells infected with the indicated HAdV type. Scale bar is  
 928 5 mm.



929 **Supplementary Figures**

930

931

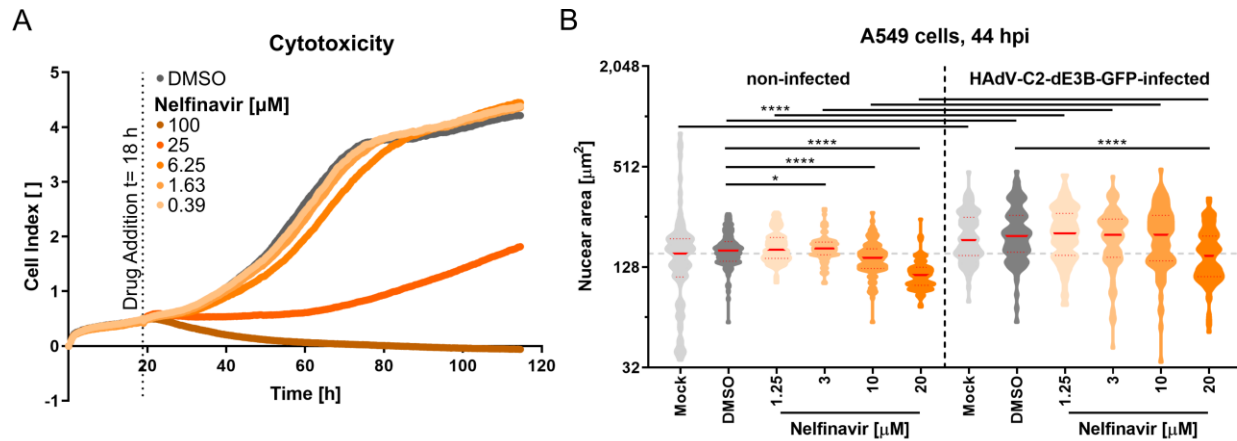

932

933 **Supplementary Figure 1: Nelfinavir exhibits low toxicity.**

934

935 **A** Cell index (CI) profiles of uninfected A549 shows little signs of toxicity up to 6.25 μM of Nelfinavir during  
936 more than 4 days. Impedance was recorded every 15 min using xCELLigence. Vertical dotted line shows  
937 the time of drug addition.

938 **B** Nelfinavir does not affect infection-induced nuclear swelling in HAAdV-C2-dE3B-GFP-infected A549 cells  
939 at 44 hpi. Each violin symbol represents the areas of 99 nuclei from four technical replicates. Significance  
940 was tested using the Kolmogorov-Smirnov test, p value ≤0.05 (\*), ≤0.0001 (\*\*\*\*). Difference is not  
941 significant, where none is indicated. Solid red lines indicate median, dotted red lines mark 5-95% quartile.  
942 Horizontal dotted grey line at median of untreated, uninfected nuclei. Note that Nelfinavir induced the  
943 shrinkage of the nuclei at 20 μM in both infected and uninfected cells, indicative of toxicity at high  
944 concentrations.



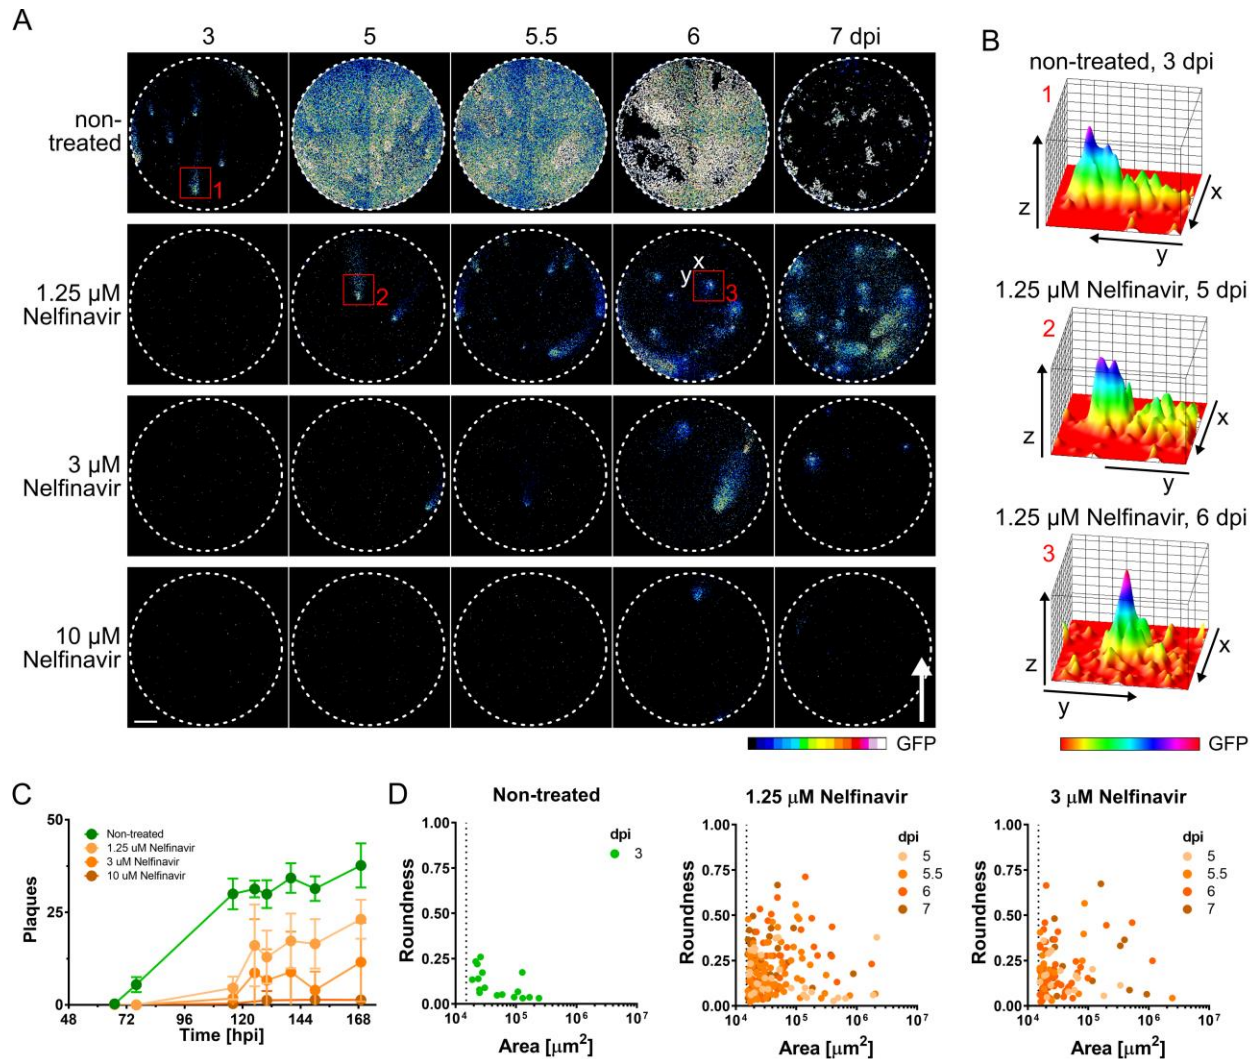

945

946

947

948

949

950

951

952

953

954

955

956

957

958

959

**Supplementary Figure 2: Characterization of round plaque phenotypes revealed by Nelfinavir.**

**A** Plate tilting to direct convection of medium fluids does not affect the spatio-temporal spread pattern of HAdV-C2-dE3B-GFP in presence Nelfinavir. Nelfinavir delays the formation and number of plaques in a concentration-dependent manner. Early plaques in absence of Nelfinavir show comet-shaped morphologies (red squares 1 and 2), while late plaques in presence of Nelfinavir appear round as exemplified by red square 3. GFP intensity is shown as 16-color LUT. White arrow indicates uphill flow of convection, and direction of elongation of comet plaques. Scale bar is 1 mm.

**B** Three-dimensional topological views of plaque morphologies generated by depicting the viral GFP expression level along the z-axis. Red numbers correspond to regions of interest (ROIs) 1 to 3, indicated by red squares in **A**. x- and y-axes are oriented as labelled in **A**. GFP intensity is shown as rainbow colour LUT, indicating the original of plaque formation where GFP intensity peaks (purple).

**C** Delay in plaque formation by Nelfinavir over time. Data points represent means of 12 replicates from two experiments, including the example well micrographs shown in **A**. Error bars indicate standard deviations.

960 DMSO-treated infected wells are shown in green, infected wells treated with 1.25, 3 or 10  $\mu$ M Nelfinavir are  
961 shown in shades of orange.

962 **D** Morphological analysis of plaque roundness compared to size over the course of Nelfinavir treatment at  
963 1.25 and 3  $\mu$ M at different times of infection (shades of orange). Data points indicate centre well plaque  
964 regions harbouring a single peak region from 12 well dishes and two experiments including the example  
965 well micrographs shown in **A**. Plaque morphologies in control wells could not be quantified later than 3 dpi,  
966 due to extensive virus dissemination. Regions consisting of at least five infected cells ( $\geq 1,500 \mu\text{m}^2$  indicated  
967 by the dotted vertical lines) were considered as plaque.

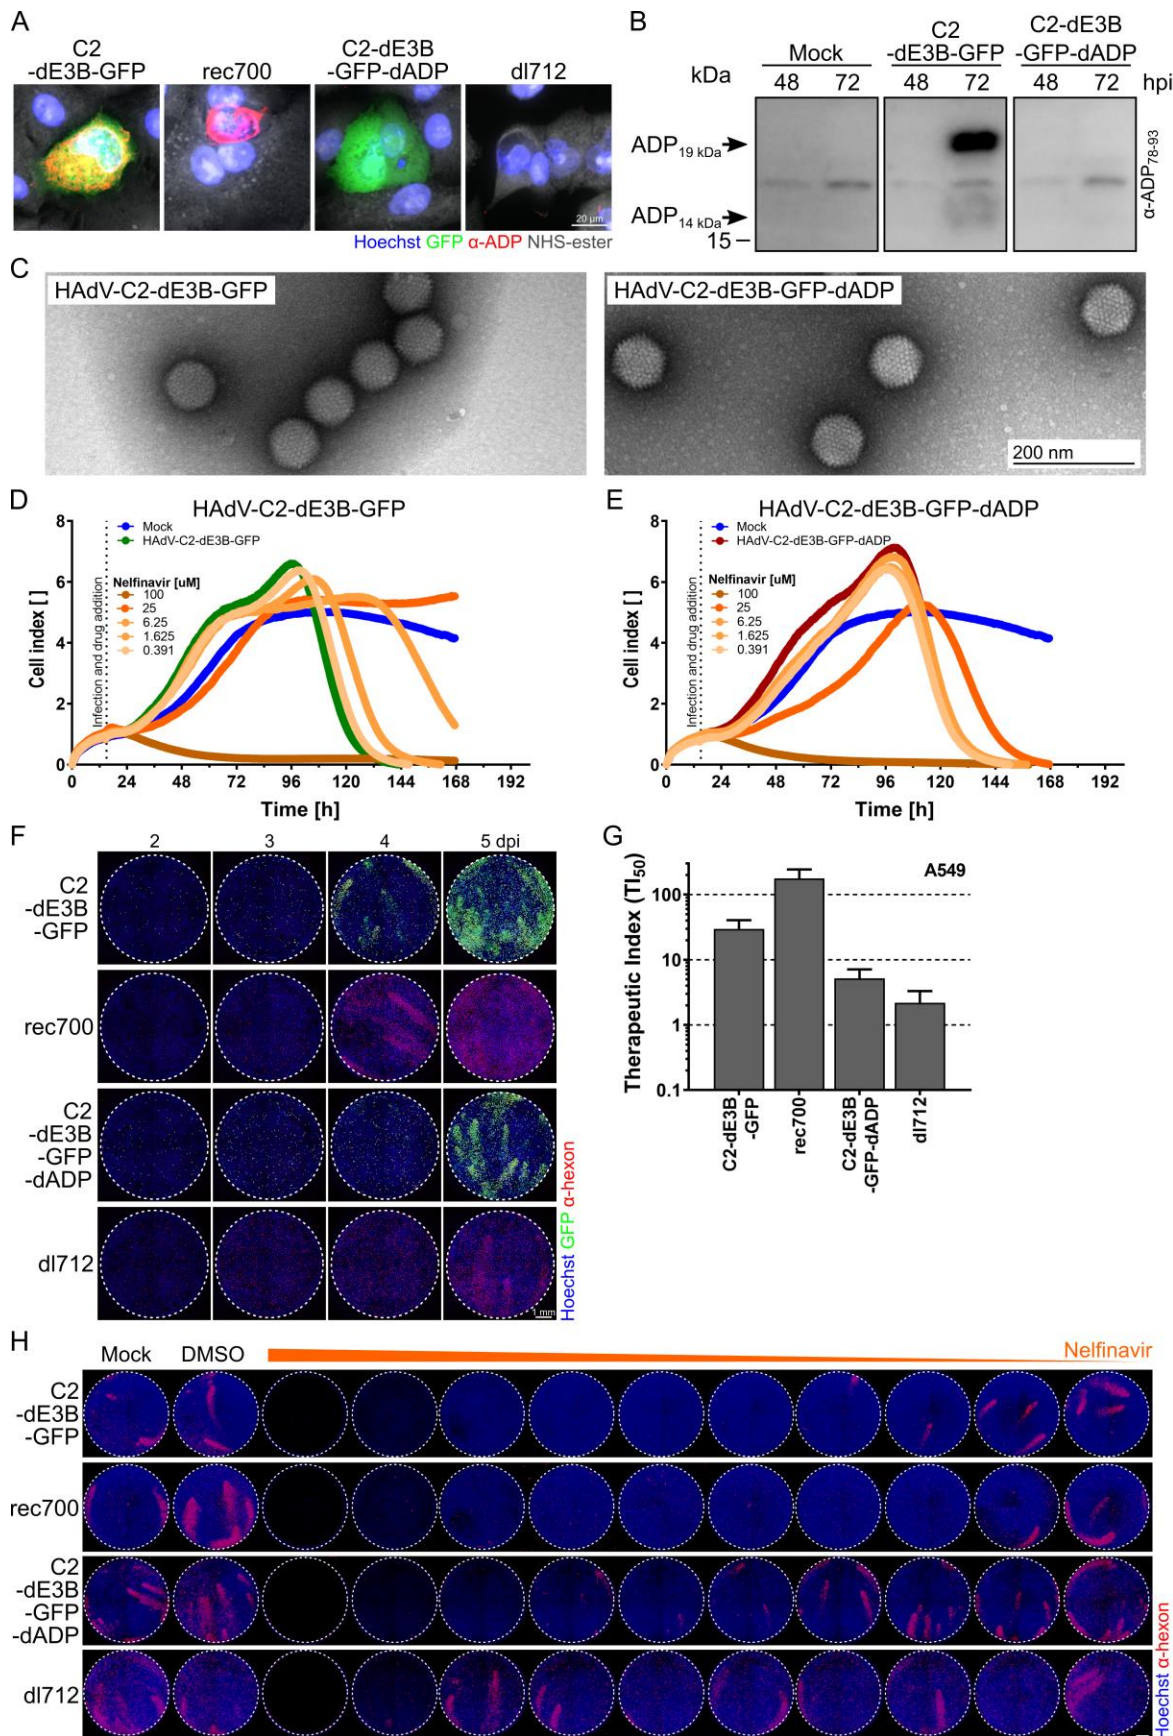

969 **Supplementary Figure 3. The mode of action of Nelfinavir is ADP-dependent irrespective of E3B**  
970 **deletion.**

971

972 **A** Lack of ADP in HAdV-C2-dE3B-GFP-dADP infected cells 44 hpi shown by indirect immunofluorescence.  
973 HAdV-C2-dE3B-GFP-dADP infected cells compared to dl712, the ADP-deleted HAdV-C5/2 rec700 mutant.  
974 Nuclei are shown in blue, GFP signal in green, ADP in red and cytosol staining in grey. Scale bar is 20  $\mu$ m.

975 **B** Western blot analyses of HAdV-C2-dE3B-GFP-dADP compared to HAdV-C2-dE3B-GFP infected cells  
976 48 and 72 hpi. Full length ADP runs with an apparent mass of 19 kDa, the cleaved 14 kDa form of ADP at  
977 16 kDa apparent mass.

978 **C** Negative stain EM micrographs of purified HAdV-C2-dE3B-GFP and HAdV-C2-dE3B-GFP-dADP  
979 particles. Scale bar indicates 200 nm.

980 **D, E** Mean cell index profiles from impedance measurements of infected A549 cells performed in two  
981 technical replicates indicate cytopathic effects. Nelfinavir inhibits cytotoxicity in DMSO-treated HAdV-C2-  
982 dE3B-GFP infection (**C**, green profile), but not in cells infected with the ADP-deletion mutant (**D**, red profile).  
983 Impedance was recorded every 15 min using xCELLigence. Each point represents the average value from  
984 two replicates with standard deviations. The time on the x-axis indicates hours after cell seeding. Vertical  
985 lines show the time of infection and drug addition. Profiles of non-infected cells are shown in blue. The  
986 concentrations of Nelfinavir are represented by different shades of orange.

987 **F** Plaque formation in ADP-deleted HAdV-C2-dE3B-GFP and dl712 compared to HAdV-C2-dE3B-GFP and  
988 rec700 in A549 is delayed by 1 day, but plaque shapes are not affected at the indicated time points. Cells  
989 were infected with  $1.1 \times 10^5$  VP / well. Nuclei signal shown in blue, viral GFP in green and hexon staining in  
990 red, scale bar is 1 mm. Dotted line indicates well outline.

991 **G** Therapeutic index (TI<sub>50</sub>), based on images shown in **H** and three additional technical replicates for HAdV-  
992 C harbouring ADP (HAdV-C2-dE3B-GFP and rec700) compared to ADP-depleted HAdV-C (HAdV-C2-  
993 dE3B-GFP-dADP and dl712). Plaque quantification was based on hexon staining. For detailed information  
994 and statistics, see Supplementary Table 2.

995 **H** Representative well images of hexon-stained HAdV-C infection of A549 cells treated with 50 to 0.1  $\mu$ M  
996 Nelfinavir (from left to right, indicated by orange triangle). Cells were fixed at 96 hpi (HAdV-C2-dE3B-GFP  
997 and rec700) or 112 hpi (HAdV-C2-dE3B-GFP-dADP and dl712). Nuclei signal is shown in blue, hexon  
998 staining in red. Scale bar is 1 mm. Dotted line indicates well outline.



999 **Supplementary Tables**

1000

1001 **Supplementary Table 1: Summary of top hits identified in the HAdV AntiVir screen.**

1002

1003 An accompanying manuscript (Georgi et al., 2020) tested the Prestwick Chemical Library (PCL) for  
 1004 potentially repurposable inhibitors of HAdV infection. The data was acquired and analysed by two  
 1005 independent research teams at UZH and EPFL. The mean infection scores normalized to the negative  
 1006 control (neg. ctr.) obtained by both teams are listed for the four top hits. 3'-deoxy-3'-fluorothymidine (DFT)  
 1007 was used as positive control (pos. ctr.). Toxicity in absence of infection was tested using the same  
 1008 experimental outline.

1009

| Compound                    | Group     | Toxic | Analysis | Normalized mean read-outs |                 |                 |         |                      |
|-----------------------------|-----------|-------|----------|---------------------------|-----------------|-----------------|---------|----------------------|
|                             |           |       |          | Nuclei                    | Infected nuclei | Infection index | Plaques | Virus intensity [AU] |
| Dimethyl sulfoxide          | neg. ctr. | no    | UZH      | 1.00                      | 1.00            | 1.00            | 1.00    | 1.00                 |
|                             |           |       | EPFL     | 1.00                      | 1.00            | 1.00            | 1.00    | 1.00                 |
| 3'-deoxy-3'-fluorothymidine | pos. ctr. | no    | UZH      | 0.83                      | 0.13            | 0.15            | 0.00    | 0.30                 |
|                             |           |       | EPFL     | 0.70                      | 0.12            | 0.17            | 0.00    | 0.32                 |
| Nelfinavir mesylate         | PCL       | no    | UZH      | 0.85                      | 0.20            | 0.23            | 0.03    | 0.30                 |
|                             |           |       | EPFL     | 0.74                      | 0.20            | 0.27            | 0.00    | 0.33                 |
| Dequalinium dichloride      | PCL       | yes   | UZH      | 0.79                      | 0.49            | 0.62            | 0.51    | 0.37                 |
|                             |           |       | EPFL     | 0.71                      | 0.33            | 0.46            | 0.44    | 0.38                 |
| Aminacrine                  | PCL       | no    | UZH      | 0.87                      | 0.53            | 0.62            | 0.75    | 0.50                 |
|                             |           |       | EPFL     | 1.42                      | 0.60            | 0.42            | 0.67    | 0.51                 |
| Thonzonium bromide          | PCL       | no    | UZH      | 0.84                      | 0.54            | 0.63            | 0.54    | 0.49                 |
|                             |           |       | EPFL     | 0.81                      | 0.45            | 0.56            | 0.56    | 0.50                 |

1010

1011



1012 **Supplementary Table 2: Statistical information on the TI<sub>50</sub> of Nelfinavir against different viruses in**  
 1013 **different cell lines.**

1014  
 1015 Indicated cell lines are infected with the indicated pfu/ well virus and fixed at the indicated time post infection.  
 1016 Plaque numbers were quantified based on viral GFP expression or HAdV hexon immunofluorescence  
 1017 staining as indicated. EC<sub>50</sub> indicates effective concentration 50%, Nelfinavir concentration leading to 50%  
 1018 reduction in plaque number/ well). TC<sub>50</sub> refers to toxic concentration 50%, Nelfinavir concentration causing  
 1019 50% reduction in nuclei number/ well. The therapeutic index, TI<sub>50</sub>, is the TC<sub>50</sub>/ EC<sub>50</sub> ratio. All values are  
 1020 means of the indicated number of technical replicates. SE gives standard error. Plaque numbers were  
 1021 quantified using Plaque2.0. Nuclei numbers were quantified based on Hoechst signal using CellProfiler.  
 1022 Non-linear regression was performed in GraphPad.

1023

|                        | Genotype              | Fixation [dpi] | Technical replicates | Read-out | Plaque number (DMSO) | EC50 [uM] | SE EC50 [uM] | TC50 [uM] | SE TC50 [uM] | TI50 (TC50/IC50) | SE TI50 |
|------------------------|-----------------------|----------------|----------------------|----------|----------------------|-----------|--------------|-----------|--------------|------------------|---------|
| A549                   | HAdV-A31              | 6              | 4                    | Hexon    | 13.0                 | 14.13     | 8.97         | 19.08     | 7.39         | 1.35             | 1.38    |
|                        | HAdV-B3-pIX-FS2A-GFP  | 3              | 4                    | Hexon    | 6.5                  | 10.22     | 10.91        | 15.29     | 4.97         | 1.50             | 2.08    |
|                        | HAdV-B7               | 4              | 4                    | Hexon    | 17.5                 | 16.92     | 14.08        | 12.61     | 4.23         | 0.75             | 0.87    |
|                        | HAdV-B11              | 3              | 4                    | Hexon    | 10.8                 | 28.89     | 41.04        | 15.29     | 4.97         | 0.53             | 0.92    |
|                        | HAdV-B14              | 3              | 3                    | Hexon    | 8.3                  | 0.84      | 0.43         | 12.00     | 3.45         | 14.22            | 11.40   |
|                        | HAdV-B14a             | 3              | 4                    | Hexon    | 10.5                 | 0.40      | 0.15         | 15.29     | 4.97         | 38.23            | 27.07   |
|                        | HAdV-B16              | 4              | 4                    | Hexon    | 8.3                  | 12.27     | 9.16         | 20.35     | 7.78         | 1.66             | 1.87    |
|                        | HAdV-B21a             | 4              | 4                    | Hexon    | 5.3                  | 16.04     | 15.56        | 20.35     | 7.78         | 1.27             | 1.72    |
|                        | HAdV-B34              | 4              | 4                    | Hexon    | 12.8                 | 3.18      | 1.18         | 20.35     | 7.78         | 6.40             | 4.81    |
|                        | HAdV-B35-pIX-FS2A-GFP | 4              | 4                    | Hexon    | 12.3                 | 2.49      | 0.76         | 15.29     | 4.97         | 6.13             | 3.87    |
|                        | HAdV-C1               | 4              | 4                    | Hexon    | 8.0                  | 1.94      | 0.47         | 23.75     | 9.91         | 12.22            | 8.09    |
|                        | HAdV-C2               | 4              | 4                    | Hexon    | 5.8                  | 0.24      | 0.09         | 17.26     | 1.61         | 71.09            | 33.69   |
|                        | HAdV-C2-dE3B-GFP      | 3              | 4                    | GFP      | 34.3                 | 0.22      | 0.05         | 14.89     | 7.34         | 66.80            | 47.02   |
|                        | HAdV-C2-dE3B-GFP      | 4              | 4                    | GFP      | 8.0                  | 0.44      | 0.09         | 12.96     | 1.21         | 29.43            | 8.73    |
|                        | HAdV-C2-dE3B-GFP      | 4              | 4                    | Hexon    | 4.3                  | 0.43      | 0.11         | 12.96     | 1.21         | 29.87            | 10.64   |
|                        | HAdV-C2-dE3B-GFP-dADP | 4              | 3                    | GFP      | 41.3                 | 5.82      | 1.65         | 12.29     | 2.06         | 2.11             | 0.95    |
|                        | HAdV-C2-dE3B-GFP-dADP | 5              | 4                    | GFP      | 9.3                  | 2.23      | 0.46         | 14.97     | 1.54         | 6.73             | 2.07    |
|                        | HAdV-C2-dE3B-GFP-dADP | 5              | 4                    | Hexon    | 5.5                  | 2.88      | 0.77         | 14.97     | 1.54         | 5.20             | 1.92    |
|                        | HAdV-C5               | 3              | 4                    | VI       | 6.3                  | 0.57      | 0.23         | 11.91     | 2.88         | 21.01            | 13.75   |
|                        | rec700 (HAdV-C5/2)    | 4              | 4                    | Hexon    | 4.0                  | 0.07      | 0.02         | 12.96     | 1.21         | 177.41           | 66.14   |
| dl712 (HAdV-C5/2-dADP) | 5                     | 4              | Hexon                | 3.5      | 6.87                 | 2.87      | 14.97        | 1.54      | 2.18         | 1.14             |         |
| HAdV-C6                | 3                     | 4              | Hexon                | 7.8      | 0.60                 | 0.20      | 21.19        | 6.55      | 35.14        | 22.45            |         |
| HAdV-D8                | 5                     | 4              | Hexon                | 8.5      | 9.09                 | 6.47      | 21.43        | 8.88      | 2.36         | 2.65             |         |
| HAdV-D30               | 5                     | 4              | Hexon                | 9.3      | 4.20                 | 1.78      | 13.36        | 1.13      | 3.18         | 1.61             |         |
| HAdV-D37               | 5                     | 4              | Hexon                | 9.0      | 16.66                | 16.38     | 21.43        | 8.88      | 1.29         | 1.80             |         |
| HSV-1-CMV-GFP          | 1                     | 4              | GFP                  | 96.5     | 2.87                 | 0.74      | 49.50        | 9.55      | 17.25        | 7.78             |         |
| HeLa                   | HAdV-C2-dE3B-GFP      | 4              | 4                    | GFP      | 12.0                 | 0.49      | 0.20         | 29.85     | 4.15         | 61.03            | 33.52   |
|                        | HAdV-C2-dE3B-GFP-dADP | 5              | 4                    | GFP      | 37.8                 | 4.68      | 0.91         | 41.69     | 3.54         | 8.91             | 2.50    |
| CMT-93                 | MAdV-1-pIX-FS2A-GFP   | 4              | 4                    | GFP      | 17.8                 | 20.72     | 22.72        | 21.29     | 10.62        | 1.03             | 1.64    |
|                        | MAdV-3-pIX-FS2A-GFP   | 4              | 4                    | GFP      | 13.5                 | 8.70      | 6.19         | 26.07     | 6.53         | 3.00             | 2.88    |
| HCE                    | HAdV-A31              | 8              | 4                    | Hexon    | 20.3                 | 18.06     | 19.45        | 19.59     | 13.50        | 1.08             | 1.92    |
|                        | HAdV-C2-dE3B-GFP      | 5              | 4                    | GFP      | 54.8                 | 0.55      | 0.10         | 29.73     | 15.31        | 54.04            | 37.20   |
| HBEC                   | HAdV-B3-pIX-FS2A-GFP  | 8              | 4                    | GFP      | 18.3                 | 6.41      | 1.21         | 12.74     | 1.10         | 1.99             | 0.55    |
|                        | HAdV-B35-pIX-FS2A-GFP | 6              | 4                    | GFP      | 25.5                 | 6.99      | 1.50         | 13.33     | 1.26         | 1.91             | 0.59    |
|                        | HAdV-C2-dE3B-GFP      | 4              | 4                    | GFP      | 23.25                | 0.53      | 0.10         | 28.97     | 2.78         | 55.18            | 15.51   |
|                        | HAdV-C2-dE3B-GFP-dADP | 4              | 4                    | GFP      | 27.50                | 2.72      | 0.58         | 12.40     | 0.77         | 4.56             | 1.25    |

1024

## 1025 **Supplementary Methods**

1026

### 1027 **Generation of HAdV-C2-dE3B-GFP-dADP**

1028 As a first, a pKSB2-based bacterial artificial chromosome vector pKSB2-AdV-C2-dE3B\_GFP  
1029 carrying the genome of HAdV-C2-dE3B-GFP (Yakimovich et al., 2012) was generated starting  
1030 with pKSB2-AdV-C2-LARAZeo containing left and right terminal HAdV-C2 fragments. To generate  
1031 pKSB2-AdV-C2-LARAZeo, two PCR-generated fragments were first cloned into pBluescript (pBl).  
1032 The first fragment encompassed 853 bp of the HAdV-C2 left end sequence and was PCR-  
1033 amplified using the forward primer 5'-ataagaatGCGGCCGCTAGGGATAACAGGGTAAT  
1034 catcatcataatataccttattttgg-3' inserting the restriction sites NotI and I-SceI, and the reverse primer  
1035 5'- CTCTCTACTAGTAATAAGTCAATCCCTTCCTGC -3' inserting the restriction site SpeI.  
1036 HAdV-C2-dE3B-GFP genomic DNA isolated from infected A549 cells was used as template. The  
1037 NotI and SpeI restriction sites were used to clone the left arm fragment into pBl. The second  
1038 fragment encompassed 853 bp of the HAdV-C2 right end sequence and was PCR-amplified using  
1039 the forward primer 5'- agagagACTAGTaaaaacattaaacattagaagcctg-3' adding the restriction sites  
1040 SpeI and the reverse primer 5'- gcgcaagcttATTACCCTGTTATCCCTAcatcatcataatataccttattttgg-  
1041 3' adding the sites I-SceI and HindIII. This fragment was cloned into pBl-AdV2-C2-LA by SpeI and  
1042 HindIII restriction sites. A SpeI fragment containing the zeocine resistance marker from pcDNA3.1  
1043 zeo (Invitrogen) and generated by PCR using the forward 5'-GACTAGTTTTTTCG  
1044 GATCTGATCAGCACG-3' and reverse primer 5-GACTAGTGGAAAACGATT CCGAAGCCC-3'  
1045 was cloned into the SpeI of pBl-AdV-C2-LARA, connecting the two HAdV-C2 arms and resulting  
1046 in pBl-AdV-C2-LARAZeo. In order to transfer the AdV-C2-LARAZeo cassette to the BACmid  
1047 pKSB2, the NotI-HindIII fragment containing this sequence was ligated with the NotI-HindIII-  
1048 restricted pKSB2 vector. Colonies containing pKSB2-AdV-C2-LARAZeo were selected using  
1049 chloramphenicol and zeocin at concentrations of 10 µg / ml and 25 µg / ml, respectively. In order  
1050 to generate pKSB2-AdV-C2-dE3B\_GFP, homologous recombination was performed in SW102  
1051 bacteria using AatII and ApaLI-restricted pKSB2-AdV-C2-LARAZeo and HAdV-C2-dE3B-GFP  
1052 genomic DNA isolated from infected A549 cells.

1053 As a second, HAdV-C2-dE3B-GFP-dADP, was generated using two recombineering steps. In a  
1054 first, the galK cassette was introduced into pKSB2-AdV-C2\_dE3B\_GFP to replace the ADP  
1055 sequence. The GalK cassette was amplified using the forward primer 5'-  
1056 ACTGCAAATTTGATCAAACC CAGCTTCAGCTTGCCTGCTCCAGAG  
1057 cctgttgacaattaatcatcggca-3' and the reverse primer 5'-  
1058 GAACTAATGACCCCGTAATTGATTACTATTAATAA CTAGTCTCATctcagcactgtcctgctcctt -3'  
1059 introducing 45 nucleotides of flanking sequences. Subsequently, the GalK sequence was  
1060 replaced with a dsDNA of the sequence actgcaaatttgatcaaaccagcttcagcttgctgctccagagatgaga  
1061 ctagtattaatagtaatcaattacggggtcattagttc resulting in deletion of ADP.

1062 To generate infectious virus, circular pKSB2-AdV-C2\_dE3B\_GFP\_dADP was transfected in  
1063 human 911 cells stably expressing I-SceI endonuclease (Ibanes and Kremer, 2013) using the  
1064 jetPEI transfection reagent (Polyplus transfection, Illkirch-Graffenstaden, France). Constitutive I-  
1065 SceI expression in these cells was accomplished following transduction with MLV-ER-I-SceI-  
1066 HA, which encodes a form of the endonuclease that can be translocated to the nucleus upon  
1067 treatment with 4-OH-tamoxifen 3 hours post transfection (Courilleau et al., 2012). Cells were

1068 selected in medium containing puromycin at 1µg / ml and bulk cultures were expanded under  
1069 selection conditions. I-SceI expression was confirmed by Western blotting of whole cell lysates  
1070 using the anti-HA antibody (HA.11 clone 16B12, Covance).

1071 **References**

- 1072
- 1073 Abou El Hassan, M.A.I., van der Meulen-Muileman, I., Abbas, S., and Kruyt, F.A.E. (2004). Conditionally  
1074 replicating adenoviruses kill tumor cells via a basic apoptotic machinery-independent mechanism that  
1075 resembles necrosis-like programmed cell death. *J. Virol.* *78*, 12243–12251.
- 1076 Adrian, T., Wadell, G., Hierholzer, J.C., and Wigand, R. (1986). DNA restriction analysis of adenovirus  
1077 prototypes 1 to 41. *Arch. Virol.* *91*, 277–290.
- 1078 Ahi, Y.S., and Mittal, S.K. (2016). Components of adenovirus genome packaging. *Front. Microbiol.* *7*, 1503.
- 1079 Ali, A., and Roossinck, M.J. (2007). Rapid and efficient purification of Cowpea chlorotic mottle virus by  
1080 sucrose cushion ultracentrifugation. *J. Virol. Methods* *141*, 84–86.
- 1081 Allen, R.J., and Byrnes, A.P. (2019). Interaction of adenovirus with antibodies, complement, and  
1082 coagulation factors. *FEBS Lett.* *593*, 3449–3460.
- 1083 Andriasyan, V., Yakimovich, A., Georgi, F., Petkidis, A., Witte, R., Puntener, D., and Greber, U.F. (2019).  
1084 Deep learning of virus infections reveals mechanics of lytic cells. *BioRxiv*.
- 1085 Atasheva, S., Yao, J., and Shayakhmetov, D.M. (2019). Innate immunity to adenovirus: lessons from mice.  
1086 *FEBS Lett.* *593*, 3461–3483.
- 1087 Bailey, E.S., Fieldhouse, J.K., Choi, J.Y., and Gray, G.C. (2018). A mini review of the zoonotic threat  
1088 potential of influenza viruses, coronaviruses, adenoviruses, and enteroviruses. *Front Public Health* *6*, 104.
- 1089 Baker, A.T., Greenshields-Watson, A., Coughlan, L., Davies, J.A., Uusi-Kerttula, H., Cole, D.K., Rizkallah,  
1090 P.J., and Parker, A.L. (2019). Diversity within the adenovirus fiber knob hypervariable loops influences  
1091 primary receptor interactions. *Nat. Commun.* *10*, 741.
- 1092 Bauer, M., Flatt, J.W., Seiler, D., Cardel, B., Emmenlauer, M., Boucke, K., Suomalainen, M., Hemmi, S.,  
1093 and Greber, U.F. (2019). The e3 ubiquitin ligase mind bomb 1 controls adenovirus genome release at the  
1094 nuclear pore complex. *Cell Rep.* *29*, 3785–3795.e8.
- 1095 Baum, S.G., Horwitz, M.S., and Maizel, J.V. (1972). Studies of the mechanism of enhancement of human  
1096 adenovirus infection in monkey cells by simian virus 40. *J. Virol.* *10*, 211–219.
- 1097 Beerli, C., Yakimovich, A., Kilcher, S., Reynoso, G.V., Fläschner, G., Müller, D.J., Hickman, H.D., and  
1098 Mercer, J. (2019). Vaccinia virus hijacks EGFR signalling to enhance virus spread through rapid and  
1099 directed infected cell motility. *Nat. Microbiol.* *4*, 216–225.
- 1100 Benevento, M., Di Palma, S., Snijder, J., Moyer, C.L., Reddy, V.S., Nemerow, G.R., and Heck, A.J.R.  
1101 (2014). Adenovirus composition, proteolysis, and disassembly studied by in-depth qualitative and  
1102 quantitative proteomics. *J. Biol. Chem.* *289*, 11421–11430.
- 1103 Benkő, M., Harrach, B., and Kremer, E.J. (2014). Do nonhuman primate or bat adenoviruses pose a risk  
1104 for human health? *Future Microbiol* *9*, 269–272.
- 1105 Berk, A.J. (2005). Recent lessons in gene expression, cell cycle control, and cell biology from adenovirus.  
1106 *Oncogene* *24*, 7673–7685.
- 1107 Bernstein, W.B., and Dennis, P.A. (2008). Repositioning HIV protease inhibitors as cancer therapeutics.  
1108 *Curr Opin HIV AIDS* *3*, 666–675.
- 1109 Bhat, B.M., and Wold, W.S. (1986). Adenovirus mutants with splice-enhancing mutations in the E3 complex  
1110 transcription unit are also defective in E3A RNA 3'-end formation. *J. Virol.* *57*, 1155–1158.
- 1111 Bieri, M. (2018). Development of Adenovirus Reporter Viruses and Studies on Mouse Adenovirus-2 and -3  
1112 Receptor Candidates. Doctoral dissertation. Department of Molecular Life Sciences, University of Zurich.
- 1113 Blaskovic, S., Blanc, M., and van der Goot, F.G. (2013). What does S-palmitoylation do to membrane  
1114 proteins? *FEBS J.* *280*, 2766–2774.
- 1115 Bremner, K.H., Scherer, J., Yi, J., Vershinin, M., Gross, S.P., and Vallee, R.B. (2009). Adenovirus transport  
1116 via direct interaction of cytoplasmic dynein with the viral capsid hexon subunit. *Cell Host Microbe* *6*, 523–  
1117 535.
- 1118 Brüning, A., Gingelmaier, A., Friese, K., and Mylonas, I. (2010). New prospects for nelfinavir in non-HIV-  
1119 related diseases. *Curr Mol Pharmacol* *3*, 91–97.

- 1120 Burckhardt, C.J., and Greber, U.F. (2009). Virus movements on the plasma membrane support infection  
1121 and transmission between cells. *PLoS Pathog.* 5, e1000621.
- 1122 Burckhardt, C.J., Suomalainen, M., Schoenenberger, P., Boucke, K., Hemmi, S., and Greber, U.F. (2011).  
1123 Drifting motions of the adenovirus receptor CAR and immobile integrins initiate virus uncoating and  
1124 membrane lytic protein exposure. *Cell Host Microbe* 10, 105–117.
- 1125 Caron, M., Auclair, M., Sterlingot, H., Kornprobst, M., and Capeau, J. (2003). Some HIV protease inhibitors  
1126 alter lamin A/C maturation and stability, SREBP-1 nuclear localization and adipocyte differentiation. *AIDS*  
1127 17, 2437–2444.
- 1128 Carpenter, A.E., Jones, T.R., Lamprecht, M.R., Clarke, C., Kang, I.H., Friman, O., Guertin, D.A., Chang,  
1129 J.H., Lindquist, R.A., Moffat, J., et al. (2006). CellProfiler: image analysis software for identifying and  
1130 quantifying cell phenotypes. *Genome Biol.* 7, R100.
- 1131 Carr, M.J., Kajon, A.E., Lu, X., Dunford, L., O'Reilly, P., Holder, P., De Gascun, C.F., Coughlan, S., Connell,  
1132 J., Erdman, D.D., et al. (2011). Deaths associated with human adenovirus-14p1 infections, Europe, 2009-  
1133 2010. *Emerging Infect. Dis.* 17, 1402–1408.
- 1134 Centers for Disease Control and Prevention (CDC) (2007). Acute respiratory disease associated with  
1135 adenovirus serotype 14--four states, 2006-2007. *MMWR Morb. Mortal. Wkly. Rep.* 56, 1181–1184.
- 1136 Charman, M., Herrmann, C., and Weitzman, M.D. (2019). Viral and cellular interactions during adenovirus  
1137 DNA replication. *FEBS Lett.* 593, 3531–3550.
- 1138 Chen, C.Y., Senac, J.S., Weaver, E.A., May, S.M., Jelinek, D.F., Greipp, P., Witzig, T., and Barry, M.A.  
1139 (2011a). Species D adenoviruses as oncolytics against B-cell cancers. *Clin. Cancer Res.* 17, 6712–6722.
- 1140 Chen, E.C., Yagi, S., Kelly, K.R., Mendoza, S.P., Tarara, R.P., Canfield, D.R., Maninger, N., Rosenthal, A.,  
1141 Spinner, A., Bales, K.L., et al. (2011b). Cross-species transmission of a novel adenovirus associated with  
1142 a fulminant pneumonia outbreak in a new world monkey colony. *PLoS Pathog.* 7, e1002155.
- 1143 Chow, W.A., Guo, S., and Valdes-Albini, F. (2006). Nelfinavir induces liposarcoma apoptosis and cell cycle  
1144 arrest by upregulating sterol regulatory element binding protein-1. *Anticancer Drugs* 17, 891–903.
- 1145 Chow, W.A., Jiang, C., and Guan, M. (2009). Anti-HIV drugs for cancer therapeutics: back to the future?  
1146 *Lancet Oncol.* 10, 61–71.
- 1147 Cramer, M., Bauer, M., Caduff, N., Walker, R., Steiner, F., Franzoso, F.D., Gujer, C., Boucke, K., Kucera,  
1148 T., Zbinden, A., et al. (2018). MxB is an interferon-induced restriction factor of human herpesviruses. *Nat.*  
1149 *Commun.* 9, 1980.
- 1150 Danthi, P. (2016). Viruses and the diversity of cell death. *Annu. Rev. Virol.* 3, 533–553.
- 1151 Davison, A.J., Akter, P., Cunningham, C., Dolan, A., Addison, C., Dargan, D.J., Hassan-Walker, A.F.,  
1152 Emery, V.C., Griffiths, P.D., and Wilkinson, G.W.G. (2003a). Homology between the human  
1153 cytomegalovirus RL11 gene family and human adenovirus E3 genes. *J. Gen. Virol.* 84, 657–663.
- 1154 Davison, A.J., Benkő, M., and Harrach, B. (2003b). Genetic content and evolution of adenoviruses. *J. Gen.*  
1155 *Virol.* 84, 2895–2908.
- 1156 Deal, C., Pekosz, A., and Ketner, G. (2013). Prospects for oral replicating adenovirus-vectored vaccines.  
1157 *Vaccine* 31, 3236–3243.
- 1158 Deutscher, S.L., Bhat, B.M., Pursley, M.H., Cladaras, C., and Wold, W.S. (1985). Novel deletion mutants  
1159 that enhance a distant upstream 5' splice in the E3 transcription unit of adenovirus 2. *Nucleic Acids Res.*  
1160 13, 5771–5788.
- 1161 Dhingra, A., Hage, E., Ganzenmueller, T., Böttcher, S., Hofmann, J., Hamprecht, K., Obermeier, P., Rath,  
1162 B., Hausmann, F., Dobner, T., et al. (2019). Molecular evolution of human adenovirus (hAdV) species C.  
1163 *Sci. Rep.* 9, 1039.
- 1164 Doceul, V., Hollinshead, M., van der Linden, L., and Smith, G.L. (2010). Repulsion of superinfecting virions:  
1165 a mechanism for rapid virus spread. *Science* 327, 873–876.
- 1166 Doronin, K., Toth, K., Kuppaswamy, M., Krajcsi, P., Tollefson, A.E., and Wold, W.S.M. (2003).  
1167 Overexpression of the ADP (E3-11.6K) protein increases cell lysis and spread of adenovirus. *Virology* 305,  
1168 378–387.



- 1169 Erdman, D.D., Xu, W., Gerber, S.I., Gray, G.C., Schnurr, D., Kajon, A.E., and Anderson, L.J. (2002).  
1170 Molecular epidemiology of adenovirus type 7 in the United States, 1966-2000. *Emerging Infect. Dis.* 8, 269–  
1171 277.
- 1172 Feng, Z., Hensley, L., McKnight, K.L., Hu, F., Madden, V., Ping, L., Jeong, S.-H., Walker, C., Lanford, R.E.,  
1173 and Lemon, S.M. (2013). A pathogenic picornavirus acquires an envelope by hijacking cellular membranes.  
1174 *Nature* 496, 367–371.
- 1175 Ferrari, R., Pellegrini, M., Horwitz, G.A., Xie, W., Berk, A.J., and Kurdستاني, S.K. (2008). Epigenetic  
1176 reprogramming by adenovirus e1a. *Science* 321, 1086–1088.
- 1177 Flatt, J.W., and Greber, U.F. (2017). Viral mechanisms for docking and delivering at nuclear pore  
1178 complexes. *Semin. Cell Dev. Biol.* 68, 59–71.
- 1179 Fonseca, B.D., Diering, G.H., Bidinosti, M.A., Dalal, K., Alain, T., Balgi, A.D., Forestieri, R., Nodwell, M.,  
1180 Rajadurai, C.V., Gunaratnam, C., et al. (2012). Structure-activity analysis of niclosamide reveals potential  
1181 role for cytoplasmic pH in control of mammalian target of rapamycin complex 1 (mTORC1) signaling. *J.*  
1182 *Biol. Chem.* 287, 17530–17545.
- 1183 Gantt, S., Carlsson, J., Ikoma, M., Gachelet, E., Gray, M., Geballe, A.P., Corey, L., Casper, C., Lagunoff,  
1184 M., and Vieira, J. (2011). The HIV protease inhibitor nelfinavir inhibits Kaposi's sarcoma-associated  
1185 herpesvirus replication in vitro. *Antimicrob. Agents Chemother.* 55, 2696–2703.
- 1186 Gantt, S., Gachelet, E., Carlsson, J., Barcy, S., Casper, C., and Lagunoff, M. (2015). Nelfinavir impairs  
1187 glycosylation of herpes simplex virus 1 envelope proteins and blocks virus maturation. *Adv Virol* 2015,  
1188 687162.
- 1189 Garnett, C.T., Erdman, D., Xu, W., and Gooding, L.R. (2002). Prevalence and quantitation of species C  
1190 adenovirus DNA in human mucosal lymphocytes. *J. Virol.* 76, 10608–10616.
- 1191 Gastaldelli, M., Imelli, N., Boucke, K., Amstutz, B., Meier, O., and Greber, U.F. (2008). Infectious adenovirus  
1192 type 2 transport through early but not late endosomes. *Traffic* 9, 2265–2278.
- 1193 Georgi, F., Kuttler, F., Murer, L., Andriasyan, V., Witte, R., Yakimovich, A., Turcatti, G., and Greber, U.F.  
1194 (2020). High-content image-based drug screen identifies a clinical compound against cell transmission of  
1195 adenovirus. *BioRxiv*.
- 1196 Gills, J.J., Lopiccio, J., Tsurutani, J., Shoemaker, R.H., Best, C.J.M., Abu-Asab, M.S., Borojerdi, J., Warfel,  
1197 N.A., Gardner, E.R., Danish, M., et al. (2007). Nelfinavir, A lead HIV protease inhibitor, is a broad-spectrum,  
1198 anticancer agent that induces endoplasmic reticulum stress, autophagy, and apoptosis in vitro and in vivo.  
1199 *Clin. Cancer Res.* 13, 5183–5194.
- 1200 Ginn, S.L., Amaya, A.K., Alexander, I.E., Edelstein, M., and Abedi, M.R. (2018). Gene therapy clinical trials  
1201 worldwide to 2017: An update. *J Gene Med* 20, e3015.
- 1202 Glauser, D.L., Seyffert, M., Strasser, R., Franchini, M., Laimbacher, A.S., Dresch, C., de Oliveira, A.P.,  
1203 Vogel, R., Büning, H., Salvetti, A., et al. (2010). Inhibition of herpes simplex virus type 1 replication by  
1204 adeno-associated virus rep proteins depends on their combined DNA-binding and ATPase/helicase  
1205 activities. *J. Virol.* 84, 3808–3824.
- 1206 Gray, G.C., McCarthy, T., Lebeck, M.G., Schnurr, D.P., Russell, K.L., Kajon, A.E., Landry, M.L., Leland,  
1207 D.S., Storch, G.A., Ginocchio, C.C., et al. (2007). Genotype prevalence and risk factors for severe clinical  
1208 adenovirus infection, United States 2004-2006. *Clin. Infect. Dis.* 45, 1120–1131.
- 1209 Greber, U.F. (1998). Virus assembly and disassembly: the adenovirus cysteine protease as a trigger factor.  
1210 *Rev Med Virol* 8, 213–222.
- 1211 Greber, U.F. (2002). Signalling in viral entry. *Cellular and Molecular Life Sciences (CMLS)* 59, 608–626.
- 1212 Greber, U.F., and Flatt, J.W. (2019). Adenovirus entry: from infection to immunity. *Annu. Rev. Virol.* 6, 177–  
1213 197.
- 1214 Greber, U.F., Willetts, M., Webster, P., and Helenius, A. (1993). Stepwise dismantling of adenovirus 2  
1215 during entry into cells. *Cell* 75, 477–486.
- 1216 Greber, U.F., Suomalainen, M., Stidwill, R.P., Boucke, K., Ebersold, M.W., and Helenius, A. (1997). The  
1217 role of the nuclear pore complex in adenovirus DNA entry. *EMBO J.* 16, 5998–6007.
- 1218 Greber, U.F., Arnberg, N., Wadell, G., Benkő, M., and Kremer, E.J. (2013). Adenoviruses - from pathogens  
1219 to therapeutics: a report on the 10th International Adenovirus Meeting. *Cell Microbiol.* 15, 16–23.

- 1220 Guan, M., Fousek, K., Jiang, C., Guo, S., Synold, T., Xi, B., Shih, C.-C., and Chow, W.A. (2011). Nelfinavir  
1221 induces liposarcoma apoptosis through inhibition of regulated intramembrane proteolysis of SREBP-1 and  
1222 ATF6. *Clin. Cancer Res.* 17, 1796–1806.
- 1223 Guan, M., Fousek, K., and Chow, W.A. (2012). Nelfinavir inhibits regulated intramembrane proteolysis of  
1224 sterol regulatory element binding protein-1 and activating transcription factor 6 in castration-resistant  
1225 prostate cancer. *FEBS J.* 279, 2399–2411.
- 1226 Guan, M., Su, L., Yuan, Y.-C., Li, H., and Chow, W.A. (2015). Nelfinavir and nelfinavir analogs block site-2  
1227 protease cleavage to inhibit castration-resistant prostate cancer. *Sci. Rep.* 5, 9698.
- 1228 Hagen, C., Dent, K.C., Zeev-Ben-Mordehai, T., Grange, M., Bosse, J.B., Whittle, C., Klupp, B.G., Siebert,  
1229 C.A., Vasishtan, D., Bäuerlein, F.J.B., et al. (2015). Structural basis of vesicle formation at the inner nuclear  
1230 membrane. *Cell* 163, 1692–1701.
- 1231 Haisma, H.J., Kamps, J.A.A.M., Kamps, G.K., Plantinga, J.A., Rots, M.G., and Bellu, A.R. (2008).  
1232 Polyinosinic acid enhances delivery of adenovirus vectors in vivo by preventing sequestration in liver  
1233 macrophages. *J. Gen. Virol.* 89, 1097–1105.
- 1234 Haque, E., Banik, U., Monowar, T., Anthony, L., and Adhikary, A.K. (2018). Worldwide increased  
1235 prevalence of human adenovirus type 3 (HAdV-3) respiratory infections is well correlated with  
1236 heterogeneous hypervariable regions (HVRs) of hexon. *PLoS One* 13, e0194516.
- 1237 Harrach, B., Tarján, Z.L., and Benkő, M. (2019). Adenoviruses across the animal kingdom: a walk in the  
1238 zoo. *FEBS Lett.*
- 1239 Hausl, M.A., Zhang, W., Müther, N., Rauschhuber, C., Franck, H.G., Merricks, E.P., Nichols, T.C., Kay,  
1240 M.A., and Ehrhardt, A. (2010). Hyperactive sleeping beauty transposase enables persistent phenotypic  
1241 correction in mice and a canine model for hemophilia B. *Mol. Ther.* 18, 1896–1906.
- 1242 Hausmann, J., Ortmann, D., Witt, E., Veit, M., and Seidel, W. (1998). Adenovirus death protein, a  
1243 transmembrane protein encoded in the E3 region, is palmitoylated at the cytoplasmic tail. *Virology* 244,  
1244 343–351.
- 1245 Hemmi, S., Geertsen, R., Mezzacasa, A., Peter, I., and Dummer, R. (1998). The presence of human  
1246 coxsackievirus and adenovirus receptor is associated with efficient adenovirus-mediated transgene  
1247 expression in human melanoma cell cultures. *Hum. Gene Ther.* 9, 2363–2373.
- 1248 Hendrickx, R.C. (2016). Study on Mouse Adenovirus Biology and Development of Their Vectors. Doctoral  
1249 dissertation. Department of Molecular Life Sciences, University of Zurich.
- 1250 Hidalgo, P., Ip, W.H., Dobner, T., and Gonzalez, R.A. (2019). The biology of the adenovirus E1B 55K  
1251 protein. *FEBS Lett.* 593, 3504–3517.
- 1252 Hiwarkar, P., Amrolia, P., Sivaprakasam, P., Lum, S.H., Doss, H., O’Rafferty, C., Petterson, T., Patrick, K.,  
1253 Silva, J., Slatter, M., et al. (2017). Brincidofovir is highly efficacious in controlling adenoviremia in pediatric  
1254 recipients of hematopoietic cell transplant. *Blood* 129, 2033–2037.
- 1255 Hiwarkar, P., Kosulin, K., Cesaro, S., Mikulska, M., Styczynski, J., Wynn, R., and Lion, T. (2018).  
1256 Management of adenovirus infection in patients after haematopoietic stem cell transplantation: State-of-  
1257 the-art and real-life current approach: A position statement on behalf of the Infectious Diseases Working  
1258 Party of the European Society of Blood and Marrow Transplantation. *Rev Med Virol* 28, e1980.
- 1259 Hurley, J.H. (2015). ESCRTs are everywhere. *EMBO J.* 34, 2398–2407.
- 1260 Hwang, S.-M., Park, D.-E., Yang, Y.-I., Park, S.-J., Lee, H.-K., Kim, M.-J., and Chun, B.-C. (2013). Outbreak  
1261 of febrile respiratory illness caused by adenovirus at a South Korean military training facility: clinical and  
1262 radiological characteristics of adenovirus pneumonia. *Jpn J Infect Dis* 66, 359–365.
- 1263 Imelli, N., Ruzsics, Z., Puntener, D., Gastaldelli, M., and Greber, U.F. (2009). Genetic reconstitution of the  
1264 human adenovirus type 2 temperature-sensitive 1 mutant defective in endosomal escape. *Virol. J.* 6, 174.
- 1265 Ismail, A.M., Zhou, X., Dyer, D.W., Seto, D., Rajaiya, J., and Chodosh, J. (2019). Genomic foundations of  
1266 evolution and ocular pathogenesis in human adenovirus species D. *FEBS Lett.* 593, 3583–3608.
- 1267 Ito, H., Aoki, H., Kühnel, F., Kondo, Y., Kubicka, S., Wirth, T., Iwado, E., Iwamaru, A., Fujiwara, K., Hess,  
1268 K.R., et al. (2006). Autophagic cell death of malignant glioma cells induced by a conditionally replicating  
1269 adenovirus. *J. Natl. Cancer Inst.* 98, 625–636.

- 1270 Jansens, R.J.J., Tishchenko, A., and Favoreel, H.W. (2020). Bridging the Gap: Virus Long-Distance Spread  
1271 via Tunneling Nanotubes. *J. Virol.* *94*.
- 1272 Jetzer, T. (2018). Characterization of the human/mouse adenovirus productive replication barrier by  
1273 transcriptionally targeting genes of type B and C adenoviruses. Master thesis. Department of Molecular Life  
1274 Sciences, University of Zurich.
- 1275 Jiang, H., Gomez-Manzano, C., Aoki, H., Alonso, M.M., Kondo, S., McCormick, F., Xu, J., Kondo, Y.,  
1276 Bekele, B.N., Colman, H., et al. (2007). Examination of the therapeutic potential of Delta-24-RGD in brain  
1277 tumor stem cells: role of autophagic cell death. *J. Natl. Cancer Inst.* *99*, 1410–1414.
- 1278 Jiang, H., White, E.J., Ríos-Vicil, C.I., Xu, J., Gomez-Manzano, C., and Fueyo, J. (2011). Human  
1279 adenovirus type 5 induces cell lysis through autophagy and autophagy-triggered caspase activity. *J. Virol.*  
1280 *85*, 4720–4729.
- 1281 Jiang, H., Gomez-Manzano, C., Rivera-Molina, Y., Lang, F.F., Conrad, C.A., and Fueyo, J. (2015).  
1282 Oncolytic adenovirus research evolution: from cell-cycle checkpoints to immune checkpoints. *Curr Opin*  
1283 *Virol* *13*, 33–39.
- 1284 Jurgeit, A., McDowell, R., Moese, S., Meldrum, E., Schwendener, R., and Greber, U.F. (2012). Niclosamide  
1285 is a proton carrier and targets acidic endosomes with broad antiviral effects. *PLoS Pathog.* *8*, e1002976.
- 1286 Kajon, A.E., Gigliotti, A.P., and Harrod, K.S. (2003). Acute inflammatory response and remodeling of airway  
1287 epithelium after subspecies B1 human adenovirus infection of the mouse lower respiratory tract. *J. Med.*  
1288 *Virol.* *71*, 233–244.
- 1289 Kajon, A.E., Hang, J., Hawksworth, A., Metzgar, D., Hage, E., Hansen, C.J., Kuschner, R.A., Blair, P.,  
1290 Russell, K.L., and Jarman, R.G. (2015). Molecular Epidemiology of Adenovirus Type 21 Respiratory Strains  
1291 Isolated From US Military Trainees (1996-2014). *J. Infect. Dis.* *212*, 871–880.
- 1292 Kaldor, S.W., Kalish, V.J., Davies, J.F., Shetty, B.V., Fritz, J.E., Appelt, K., Burgess, J.A., Campanale, K.M.,  
1293 Chirgadze, N.Y., Clawson, D.K., et al. (1997). Viracept (nelfinavir mesylate, AG1343): a potent, orally  
1294 bioavailable inhibitor of HIV-1 protease. *J. Med. Chem.* *40*, 3979–3985.
- 1295 Kalu, N.N., Desai, P.J., Shirley, C.M., Gibson, W., Dennis, P.A., and Ambinder, R.F. (2014). Nelfinavir  
1296 inhibits maturation and export of herpes simplex virus 1. *J. Virol.* *88*, 5455–5461.
- 1297 King, C.R., Zhang, A., Tessier, T.M., Gameiro, S.F., and Mymryk, J.S. (2018). Hacking the cell: network  
1298 intrusion and exploitation by adenovirus E1A. *MBio* *9*.
- 1299 Kleinberger, T. (2019). Biology of the adenovirus E4orf4 protein: from virus infection to cancer cell death.  
1300 *FEBS Lett.*
- 1301 Koltai, T. (2015). Nelfinavir and other protease inhibitors in cancer: mechanisms involved in anticancer  
1302 activity. [version 2; peer review: 2 approved]. *F1000Res.* *4*, 9.
- 1303 Kosulin, K., Geiger, E., Vécsei, A., Huber, W.D., Rauch, M., Brenner, E., Wrba, F., Hammer, K., Innerhofer,  
1304 A., Pötschger, U., et al. (2016). Persistence and reactivation of human adenoviruses in the gastrointestinal  
1305 tract. *Clin. Microbiol. Infect.* *22*, 381.e1–381.e8.
- 1306 Krilov, L.R. (2005). Adenovirus infections in the immunocompromised host. *Pediatr. Infect. Dis. J.* *24*, 555–  
1307 556.
- 1308 Lam, E., Ramke, M., Warnecke, G., Schrepfer, S., Kopfnagel, V., Dobner, T., and Heim, A. (2015). Effective  
1309 apical infection of differentiated human bronchial epithelial cells and induction of proinflammatory  
1310 chemokines by the highly pneumotropic human adenovirus type 14p1. *PLoS One* *10*, e0131201.
- 1311 Lawler, S.E., Speranza, M.-C., Cho, C.-F., and Chiocca, E.A. (2017). Oncolytic viruses in cancer treatment:  
1312 A review. *JAMA Oncol.* *3*, 841–849.
- 1313 Leopold, P.L., Kreitzer, G., Miyazawa, N., Rempel, S., Pfister, K.K., Rodriguez-Boulan, E., and Crystal,  
1314 R.G. (2000). Dynein- and microtubule-mediated translocation of adenovirus serotype 5 occurs after  
1315 endosomal lysis. *Hum. Gene Ther.* *11*, 151–165.
- 1316 Lion, T. (2019). Adenovirus persistence, reactivation, and clinical management. *FEBS Lett.*
- 1317 Lippincott-Schwartz, J., Freed, E.O., and van Engelenburg, S.B. (2017). A Consensus View of ESCRT-  
1318 Mediated Human Immunodeficiency Virus Type 1 Abscission. *Annu. Rev. Virol.* *4*, 309–325.
- 1319 Liu, H., Jin, L., Koh, S.B.S., Atanasov, I., Schein, S., Wu, L., and Zhou, Z.H. (2010). Atomic structure of  
1320 human adenovirus by cryo-EM reveals interactions among protein networks. *Science* *329*, 1038–1043.

- 1321 Longer, M., Shetty, B., Zamansky, I., and Tyle, P. (1995). Preformulation studies of a novel HIV protease  
1322 inhibitor, AG1343. *J. Pharm. Sci.* *84*, 1090–1093.
- 1323 Louie, J.K., Kajon, A.E., Holodniy, M., Guardia-LaBar, L., Lee, B., Petru, A.M., Hacker, J.K., and Schnurr,  
1324 D.P. (2008). Severe pneumonia due to adenovirus serotype 14: a new respiratory threat? *Clin. Infect. Dis.*  
1325 *46*, 421–425.
- 1326 Luisoni, S., Suomalainen, M., Boucke, K., Tanner, L.B., Wenk, M.R., Guan, X.L., Grzybek, M., Coskun, Ü.,  
1327 and Greber, U.F. (2015). Co-option of Membrane Wounding Enables Virus Penetration into Cells. *Cell Host*  
1328 *Microbe* *18*, 75–85.
- 1329 Lynch, J.P., and Kajon, A.E. (2016). Adenovirus: epidemiology, global spread of novel serotypes, and  
1330 advances in treatment and prevention. *Semin Respir Crit Care Med* *37*, 586–602.
- 1331 Lynch, K.L., Gooding, L.R., Garnett-Benson, C., Ornelles, D.A., and Avgousti, D.C. (2019). Epigenetics and  
1332 the dynamics of chromatin during adenovirus infections. *FEBS Lett.* *593*, 3551–3570.
- 1333 Madan, V., Castelló, A., and Carrasco, L. (2008). Viroporins from RNA viruses induce caspase-dependent  
1334 apoptosis. *Cell Microbiol.* *10*, 437–451.
- 1335 Mangel, W.F., and San Martín, C. (2014). Structure, function and dynamics in adenovirus maturation.  
1336 *Viruses* *6*, 4536–4570.
- 1337 Mei, Y.-F., Lindman, K., and Wadell, G. (2002). Human adenoviruses of subgenera B, C, and E with various  
1338 tropisms differ in both binding to and replication in the epithelial A549 and 293 cells. *Virology* *295*, 30–43.
- 1339 Meier, O., and Greber, U.F. (2004). Adenovirus endocytosis. *J Gene Med* *6 Suppl 1*, S152–63.
- 1340 Metzgar, D., Osuna, M., Kajon, A.E., Hawksworth, A.W., Irvine, M., and Russell, K.L. (2007). Abrupt  
1341 emergence of diverse species B adenoviruses at US military recruit training centers. *J. Infect. Dis.* *196*,  
1342 1465–1473.
- 1343 Mothes, W., Sherer, N.M., Jin, J., and Zhong, P. (2010). Virus cell-to-cell transmission. *J. Virol.* *84*, 8360–  
1344 8368.
- 1345 Moyle, G.J., Youle, M., Higgs, C., Monaghan, J., Prince, W., Chapman, S., Clendeninn, N., and Nelson,  
1346 M.R. (1998). Safety, pharmacokinetics, and antiretroviral activity of the potent, specific human  
1347 immunodeficiency virus protease inhibitor nelfinavir: results of a phase I/II trial and extended follow-up in  
1348 patients infected with human immunodeficiency virus. *J. Clin. Pharmacol.* *38*, 736–743.
- 1349 Murali, V.K., Ornelles, D.A., Gooding, L.R., Wilms, H.T., Huang, W., Tollefson, A.E., Wold, W.S.M., and  
1350 Garnett-Benson, C. (2014). Adenovirus death protein (ADP) is required for lytic infection of human  
1351 lymphocytes. *J. Virol.* *88*, 903–912.
- 1352 Nemerow, G., and Flint, J. (2019). Lessons learned from adenovirus (1970-2019). *FEBS Lett.* *593*, 3395–  
1353 3418.
- 1354 O’Flanagan, D., O’Donnell, J., Domegan, L., Fitzpatrick, F., Connell, J., Coughlan, S., De Gascun, C., and  
1355 Carr, M.J. (2011). First reported cases of human adenovirus serotype 14p1 infection, Ireland, October 2009  
1356 to July 2010. *Euro Surveill.* *16*.
- 1357 Oliveira, E.R.A., and Bouvier, M. (2019). Immune evasion by adenoviruses: a window into host-virus  
1358 adaptation. *FEBS Lett.* *593*, 3496–3503.
- 1359 Pacesa, M., Hendrickx, R., Bieri, M., Flatt, J.W., Greber, U.F., and Hemmi, S. (2017). Small-size  
1360 recombinant adenoviral hexon protein fragments for the production of virus-type specific antibodies. *Virol.*  
1361 *J.* *14*, 158.
- 1362 Pelka, P., Ablack, J.N.G., Fonseca, G.J., Yousef, A.F., and Mymryk, J.S. (2008). Intrinsic structural disorder  
1363 in adenovirus E1A: a viral molecular hub linking multiple diverse processes. *J. Virol.* *82*, 7252–7263.
- 1364 Pied, N., and Wodrich, H. (2019). Imaging the adenovirus infection cycle. *FEBS Lett.* *593*, 3419–3448.
- 1365 Potter, R.N., Cantrell, J.A., Mallak, C.T., and Gaydos, J.C. (2012). Adenovirus-associated deaths in US  
1366 military during postvaccination period, 1999-2010. *Emerging Infect. Dis.* *18*, 507–509.
- 1367 Prasad, V., Suomalainen, M., Pennauer, M., Yakimovich, A., Andriasyan, V., Hemmi, S., and Greber, U.F.  
1368 (2014). Chemical induction of unfolded protein response enhances cancer cell killing through lytic virus  
1369 infection. *J. Virol.* *88*, 13086–13098.



- 1370 Prasad, V., Suomalainen, M., Jasiqi, Y., Hemmi, S., Hearing, P., Hosie, L., Burgert, H.-G., and Greber, U.F.  
1371 (2020a). The UPR sensor IRE1 $\alpha$  and the adenovirus E3-19K glycoprotein sustain persistent and lytic  
1372 infections. *Nat. Commun.*
- 1373 Prasad, V., Suomalainen, M., Jasiqi, Y., Hemmi, S., Hearing, P., Hosie, L., Burgert, H.-G., and Greber, U.F.  
1374 (2020b). The UPR sensor IRE1 $\alpha$  and the adenovirus E3-19K glycoprotein sustain persistent and lytic  
1375 infections. *Nat. Commun.*
- 1376 Prusinkiewicz, M.A., and Mymryk, J.S. (2019). Metabolic reprogramming of the host cell by human  
1377 adenovirus infection. *Viruses* 11.
- 1378 R Core Team (2018). R: A Language and Environment for Statistical Computing (Vienna, Austria: R  
1379 Foundation for Statistical Computing).
- 1380 Radin, J.M., Hawksworth, A.W., Blair, P.J., Faix, D.J., Raman, R., Russell, K.L., and Gray, G.C. (2014).  
1381 Dramatic decline of respiratory illness among US military recruits after the renewed use of adenovirus  
1382 vaccines. *Clin. Infect. Dis.* 59, 962–968.
- 1383 Radke, J.R., Yong, S.L., and Cook, J.L. (2016). Low-Level Expression of the E1B 20-Kilodalton Protein by  
1384 Adenovirus 14p1 Enhances Viral Immunopathogenesis. *J. Virol.* 90, 497–505.
- 1385 Rao, L., Debbas, M., Sabbatini, P., Hockenbery, D., Korsmeyer, S., and White, E. (1992). The adenovirus  
1386 E1A proteins induce apoptosis, which is inhibited by the E1B 19-kDa and Bcl-2 proteins. *Proc. Natl. Acad.*  
1387 *Sci. USA* 89, 7742–7746.
- 1388 Reddy, V.S., Natchiar, S.K., Stewart, P.L., and Nemerow, G.R. (2010). Crystal structure of human  
1389 adenovirus at 3.5 Å resolution. *Science* 329, 1071–1075.
- 1390 Reily, C., Stewart, T.J., Renfrow, M.B., and Novak, J. (2019). Glycosylation in health and disease. *Nat.*  
1391 *Rev. Nephrol.* 15, 346–366.
- 1392 Roberts, K.L., and Smith, G.L. (2008). Vaccinia virus morphogenesis and dissemination. *Trends Microbiol.*  
1393 16, 472–479.
- 1394 Robinson, C.M., Singh, G., Lee, J.Y., Dehghan, S., Rajaiya, J., Liu, E.B., Yousuf, M.A., Betensky, R.A.,  
1395 Jones, M.S., Dyer, D.W., et al. (2013). Molecular evolution of human adenoviruses. *Sci. Rep.* 3, 1812.
- 1396 Robinson, M., Li, B., Ge, Y., Ko, D., Yendluri, S., Harding, T., VanRoey, M., Spindler, K.R., and Jooss, K.  
1397 (2009). Novel immunocompetent murine tumor model for evaluation of conditionally replication-competent  
1398 (oncolytic) murine adenoviral vectors. *J. Virol.* 83, 3450–3462.
- 1399 Rowe, W.P., Huebner, R.J., Gilmore, L.K., Parrott, R.H., and Ward, T.G. (1953). Isolation of a  
1400 cytopathogenic agent from human adenoids undergoing spontaneous degeneration in tissue culture. *Proc*  
1401 *Soc Exp Biol Med* 84, 570–573.
- 1402 Scaria, A., Tollefson, A.E., Saha, S.K., and Wold, W.S. (1992). The E3-11.6K protein of adenovirus is an  
1403 Asn-glycosylated integral membrane protein that localizes to the nuclear membrane. *Virology* 191, 743–  
1404 753.
- 1405 Scott, C., and Griffin, S. (2015). Viroporins: structure, function and potential as antiviral targets. *J. Gen.*  
1406 *Virol.* 96, 2000–2027.
- 1407 Shim, J.S., and Liu, J.O. (2014). Recent advances in drug repositioning for the discovery of new anticancer  
1408 drugs. *Int. J. Biol. Sci.* 10, 654–663.
- 1409 Sirena, D., Lilienfeld, B., Eisenhut, M., Kälin, S., Boucke, K., Beerli, R.R., Vogt, L., Ruedl, C., Bachmann,  
1410 M.F., Greber, U.F., et al. (2004). The human membrane cofactor CD46 is a receptor for species B  
1411 adenovirus serotype 3. *J. Virol.* 78, 4454–4462.
- 1412 Sohn, S.-Y., and Hearing, P. (2019). Adenoviral strategies to overcome innate cellular responses to  
1413 infection. *FEBS Lett.* 593, 3484–3495.
- 1414 Spiegel, M. (2009). Real-time and Dynamic Monitoring of Virus-mediated Cytopathogenicity. *Biochemica*  
1415 15–17.
- 1416 State of New Jersey Department of Health (2019). Adenovirus.
- 1417 Studer, L. (2017). Overcome the species barrier of productive human adenovirus infection in murine cells.  
1418 Master thesis. Department of Molecular Life Sciences, University of Zurich.
- 1419 Suomalainen, M., and Greber, U.F. (2013). Uncoating of non-enveloped viruses. *Curr Opin Virol* 3, 27–33.



- 1420 Suomalainen, M., Nakano, M.Y., Keller, S., Boucke, K., Stidwill, R.P., and Greber, U.F. (1999). Microtubule-  
1421 dependent plus- and minus end-directed motilities are competing processes for nuclear targeting of  
1422 adenovirus. *J. Cell Biol.* *144*, 657–672.
- 1423 Tetko, I.V., Gasteiger, J., Todeschini, R., Mauri, A., Livingstone, D., Ertl, P., Palyulin, V.A., Radchenko,  
1424 E.V., Zefirov, N.S., Makarenko, A.S., et al. (2005). Virtual computational chemistry laboratory--design and  
1425 description. *J. Comput. Aided Mol. Des.* *19*, 453–463.
- 1426 To, K.K.W., Tse, H., Chan, W.-M., Choi, G.K.Y., Zhang, A.J.X., Sridhar, S., Wong, S.C.Y., Chan, J.F.W.,  
1427 Chan, A.S.F., Woo, P.C.Y., et al. (2014). A novel psittacine adenovirus identified during an outbreak of  
1428 avian chlamydiosis and human psittacosis: zoonosis associated with virus-bacterium coinfection in birds.  
1429 *PLoS Negl. Trop. Dis.* *8*, e3318.
- 1430 Tollefson, A.E., Scaria, A., Saha, S.K., and Wold, W.S. (1992). The 11,600-MW protein holder encoded by region  
1431 E3 of adenovirus is expressed early but is greatly amplified at late stages of infection. *J. Virol.* *66*, 3633–  
1432 3642.
- 1433 Tollefson, A.E., Scaria, A., Hermiston, T.W., Ryerse, J.S., Wold, L.J., and Wold, W.S. (1996a). The  
1434 adenovirus death protein (E3-11.6K) is required at very late stages of infection for efficient cell lysis and  
1435 release of adenovirus from infected cells. *J. Virol.* *70*, 2296–2306.
- 1436 Tollefson, A.E., Ryerse, J.S., Scaria, A., Hermiston, T.W., and Wold, W.S. (1996b). The E3-11.6-kDa  
1437 adenovirus death protein (ADP) is required for efficient cell death: characterization of cells infected with adp  
1438 mutants. *Virology* *220*, 152–162.
- 1439 Tollefson, A.E., Scaria, A., Ying, B., and Wold, W.S.M. (2003). Mutations within the ADP (E3-11.6K) protein  
1440 alter processing and localization of ADP and the kinetics of cell lysis of adenovirus-infected cells. *J. Virol.*  
1441 *77*, 7764–7778.
- 1442 Tollefson, A.E., Ying, B., Spencer, J.F., Sagartz, J.E., Wold, W.S.M., and Toth, K. (2017). Pathology in  
1443 Permissive Syrian Hamsters after Infection with Species C Human Adenovirus (HAdV-C) Is the Result of  
1444 Virus Replication: HAdV-C6 Replicates More and Causes More Pathology than HAdV-C5. *J. Virol.* *91*.
- 1445 Toma, S., Yamashiro, T., Arakaki, S., Shiroma, J., Maeshiro, T., Hibiya, K., Sakamoto, N., Kinjo, F.,  
1446 Tateyama, M., and Fujita, J. (2009). Inhibition of intracellular hepatitis C virus replication by nelfinavir and  
1447 synergistic effect with interferon-alpha. *J. Viral Hepat* *16*, 506–512.
- 1448 Topal, M.D. (1984). Molecular mechanisms of chemical mutagenesis: 9-aminoacridine inhibits DNA  
1449 replication in vitro by destabilizing the DNA growing point and interacting with the DNA polymerase.  
1450 *Biochemistry* *23*, 2367–2372.
- 1451 Uchino, J., Curiel, D.T., and Ugai, H. (2014). Species D human adenovirus type 9 exhibits better virus-  
1452 spread ability for antitumor efficacy among alternative serotypes. *PLoS One* *9*, e87342.
- 1453 van der Grein, S.G., Defourny, K.A.Y., Slot, E.F.J., and Nolte-’t Hoen, E.N.M. (2018). Intricate relationships  
1454 between naked viruses and extracellular vesicles in the crosstalk between pathogen and host. *Semin*  
1455 *Immunopathol* *40*, 491–504.
- 1456 Varghese, R., Mikyas, Y., Stewart, P.L., and Ralston, R. (2004). Postentry neutralization of adenovirus type  
1457 5 by an anti-hexon antibody. *J. Virol.* *78*, 12320–12332.
- 1458 Veit, M. (2012). Palmitoylation of virus proteins. *Biol. Cell* *104*, 493–515.
- 1459 Verboon, J.M., Nakamura, M., Decker, J.R., Davidson, K.A., Nandakumar, V., and Parkhurst, S.M. (2019).  
1460 Wash and the WASH Regulatory Complex function in Nuclear Envelope budding. *BioRxiv*.
- 1461 Wang, I.-H., Burckhardt, C.J., Yakimovich, A., Morf, M.K., and Greber, U.F. (2017). The nuclear export  
1462 factor CRM1 controls juxta-nuclear microtubule-dependent virus transport. *J. Cell Sci.* *130*, 2185–2195.
- 1463 Wang, I.-H., Burckhardt, C.J., Yakimovich, A., and Greber, U.F. (2018). Imaging, Tracking and  
1464 Computational Analyses of Virus Entry and Egress with the Cytoskeleton. *Viruses* *10*.
- 1465 Warming, S., Costantino, N., Court, D.L., Jenkins, N.A., and Copeland, N.G. (2005). Simple and highly  
1466 efficient BAC recombineering using galK selection. *Nucleic Acids Res.* *33*, e36.
- 1467 Wiethoff, C.M., Wodrich, H., Gerace, L., and Nemerow, G.R. (2005). Adenovirus protein VI mediates  
1468 membrane disruption following capsid disassembly. *J. Virol.* *79*, 1992–2000.
- 1469 Wold, W.S., and Gooding, L.R. (1991). Region E3 of adenovirus: a cassette of genes involved in host  
1470 immunosurveillance and virus-cell interactions. *Virology* *184*, 1–8.

- 1471 Wold, W.S., Cladaras, C., Magie, S.C., and Yacoub, N. (1984). Mapping a new gene that encodes an  
1472 11,600-molecular-weight protein in the E3 transcription unit of adenovirus 2. *J. Virol.* *52*, 307–313.
- 1473 Wold, W.S.M., Deutscher, S.L., Takemori, N., Bhat, B.M., and Magie, S.C. (1986). Evidence that AGAUA  
1474 and CCAGA initiate translation in the same mRNA in region E3 of adenovirus. *Virology* *148*, 168–180.
- 1475 Wold, W.S.M., Tollefson, A.E., Ying, B., Spencer, J.F., and Toth, K. (2019). Drug development against  
1476 human adenoviruses and its advancement by Syrian hamster models. *FEMS Microbiol. Rev.* *43*, 380–388.
- 1477 Wolfrum, N., and Greber, U.F. (2013). Adenovirus signalling in entry. *Cell Microbiol.* *15*, 53–62.
- 1478 Yakimovich, A., Gumpert, H., Burckhardt, C.J., Lütsch, V.A., Jurgeit, A., Sbalzarini, I.F., and Greber, U.F.  
1479 (2012). Cell-free transmission of human adenovirus by passive mass transfer in cell culture simulated in a  
1480 computer model. *J. Virol.* *86*, 10123–10137.
- 1481 Yakimovich, A., Andriasyan, V., Witte, R., Wang, I.-H., Prasad, V., Suomalainen, M., and Greber, U.F.  
1482 (2015). Plaque2.0-A High-Throughput Analysis Framework to Score Virus-Cell Transmission and Clonal  
1483 Cell Expansion. *PLoS One* *10*, e0138760.
- 1484 Yamamoto, N., Yang, R., Yoshinaka, Y., Amari, S., Nakano, T., Cinatl, J., Rabenau, H., Doerr, H.W.,  
1485 Hunsmann, G., Otaka, A., et al. (2004). HIV protease inhibitor nelfinavir inhibits replication of SARS-  
1486 associated coronavirus. *Biochem. Biophys. Res. Commun.* *318*, 719–725.
- 1487 Yang, Y., Ikezoe, T., Takeuchi, T., Adachi, Y., Ohtsuki, Y., Takeuchi, S., Koeffler, H.P., and Taguchi, H.  
1488 (2005). HIV-1 protease inhibitor induces growth arrest and apoptosis of human prostate cancer LNCaP  
1489 cells in vitro and in vivo in conjunction with blockade of androgen receptor STAT3 and AKT signaling.  
1490 *Cancer Sci.* *96*, 425–433.
- 1491 Yun, C.-O., Kim, E., Koo, T., Kim, H., Lee, Y., and Kim, J.-H. (2005). ADP-overexpressing adenovirus elicits  
1492 enhanced cytopathic effect by induction of apoptosis. *Cancer Gene Ther* *12*, 61–71.
- 1493 Zemke, N.R., and Berk, A.J. (2017). The adenovirus E1A C terminus suppresses a delayed antiviral  
1494 response and modulates RAS signaling. *Cell Host Microbe* *22*, 789–800.e5.
- 1495 Zhang, Y., Chen, X., Gueydan, C., and Han, J. (2018). Plasma membrane changes during programmed  
1496 cell deaths. *Cell Res.* *28*, 9–21.
- 1497 Zheng, Y., Stamminger, T., and Hearing, P. (2016). E2f/rb family proteins mediate interferon induced  
1498 repression of adenovirus immediate early transcription to promote persistent viral infection. *PLoS Pathog.*  
1499 *12*, e1005415.
- 1500 Zhong, P., Agosto, L.M., Munro, J.B., and Mothes, W. (2013). Cell-to-cell transmission of viruses. *Curr Opin*  
1501 *Virol* *3*, 44–50.
- 1502 Zhou, J., Scherer, J., Yi, J., and Vallee, R.B. (2018). Role of kinesins in directed adenovirus transport and  
1503 cytoplasmic exploration. *PLoS Pathog.* *14*, e1007055.
- 1504 Zou, A., Atencio, I., Huang, W.-M., Horn, M., and Ramachandra, M. (2004). Overexpression of adenovirus  
1505 E3-11.6K protein induces cell killing by both caspase-dependent and caspase-independent mechanisms.  
1506 *Virology* *326*, 240–249.
- 1507
